# Supplementary material for: Facile synthesis of 4-vinyl- and 4-fluorovinyl-1,2,3-triazoles via bifunctional “click-olefination” reagents
Source: Royal Society of Chemistry journal article supplement (doi:10.1039/c0cc05083k), 2011-01-01

## Supporting Information

# Facile synthesis of 4-vinyl- and 4-fluorovinyl-1,2,3-triazoles via bifunctional “*click-olefination*” reagents

Rakesh Kumar, Padmanava Pradhan and Barbara Zajc\*

*Department of Chemistry, The City College and The City University of New York, 160  
Convent Avenue, New York, New York 10031*

## TABLE OF CONTENTS

| Information                                                                                        | Page |
|----------------------------------------------------------------------------------------------------|------|
| General Experimental Methods                                                                       | 3    |
| 2-[3-(Trimethylsilyl)prop-2-ynylsulfonyl]benzo[d]thiazole (1)                                      | 3    |
| 2-[1-Fluoro-3-(trimethylsilyl)prop-2-ynylsulfonyl]benzo[d]thiazole (2)                             | 4    |
| 2-(1-Fluoroprop-2-ynylsulfonyl)benzo[d]thiazole (2a)                                               | 5    |
| Synthesis of Azides                                                                                | 5    |
| 4-Methoxyphenyl Azide                                                                              | 5    |
| General Procedure for Synthesis of Alkyl Azides                                                    | 5    |
| 3-Phenylpropyl Azide                                                                               | 6    |
| Decyl Azide                                                                                        | 6    |
| Synthesis of Triazoles                                                                             | 6    |
| General Procedure                                                                                  | 6    |
| 2-[[1-(4-Methoxyphenyl)-1 <i>H</i> -1,2,3-triazol-4-yl]methylsulfonyl]benzo[d]thiazole (3)         | 6    |
| 2-[[Fluoro[1-(4-methoxyphenyl)-1 <i>H</i> -1,2,3-triazol-4-yl]methylsulfonyl]benzo[d]-thiazole (4) | 7    |
| 2-[[1-(3-Phenylpropyl)-1 <i>H</i> -1,2,3-triazol-4-yl]methylsulfonyl]benzo[d]thiazole (5)          | 7    |
| 2-[[Fluoro[1-(3-phenylpropyl)-1 <i>H</i> -1,2,3-triazol-4-yl]methylsulfonyl]benzo[d]-thiazole (6)  | 7    |
| 2-[[1-(Decyl-1 <i>H</i> -1,2,3-triazol-4-yl)methylsulfonyl]benzo[d]thiazole (7)                    | 8    |
| 2-[[1-(Decyl-1 <i>H</i> -1,2,3-triazol-4-yl)fluoromethylsulfonyl]benzo[d]thiazole (8)              | 8    |
| Competitive Click Reaction                                                                         | 9    |
| General Procedure                                                                                  | 9    |
| Synthesis of Vinyl Triazoles                                                                       | 9    |
| General Procedure                                                                                  | 9    |
| Table 1: HRMS and <sup>19</sup> F NMR Data                                                         | 10   |
| Data from DFT Computational Analysis                                                               | 12   |
| Table 2: HOMO and LUMO Energies                                                                    | 12   |
| Table 3: NBO Analyzed Natural Charges                                                              | 12   |
| References                                                                                         | 13   |
| <sup>1</sup> H NMR of 2-[3-(Trimethylsilyl)prop-2-ynylsulfonyl]benzo[d]thiazole (1)                | 14   |
| <sup>13</sup> C NMR of 2-[3-(Trimethylsilyl)prop-2-ynylsulfonyl]benzo[d]thiazole (1)               | 15   |

|                                                                                                                                   |    |
|-----------------------------------------------------------------------------------------------------------------------------------|----|
| <sup>1</sup> H NMR of 2-[1-Fluoro-3-(trimethylsilyl)prop-2-ynylsulfonyl]benzo[d]thiazole ( <b>2</b> )                             | 16 |
| <sup>13</sup> C NMR of 2-[1-Fluoro-3-(trimethylsilyl)prop-2-ynylsulfonyl]benzo[d]thiazole ( <b>2</b> )                            | 17 |
| <sup>1</sup> H NMR of 2-(1-Fluoroprop-2-ynylsulfonyl)benzo[d]thiazole ( <b>2a</b> ) (Crude product)                               | 18 |
| <sup>13</sup> C NMR of 2-(1-Fluoroprop-2-ynylsulfonyl)benzo[d]thiazole ( <b>2a</b> ) (Crude product)                              | 19 |
| <sup>1</sup> H NMR of 2-[[1-(4-Methoxyphenyl)-1 <i>H</i> -1,2,3-triazol-4-yl]methylsulfonyl]benzo[d]thiazole ( <b>3</b> )         | 20 |
| <sup>13</sup> C NMR of 2-[[1-(4-Methoxyphenyl)-1 <i>H</i> -1,2,3-triazol-4-yl]methylsulfonyl]benzo[d]thiazole ( <b>3</b> )        | 21 |
| <sup>1</sup> H NMR of 2-{Fluoro[1-(4-methoxyphenyl)-1 <i>H</i> -1,2,3-triazol-4-yl]methylsulfonyl}benzo[d]-thiazole ( <b>4</b> )  | 22 |
| <sup>13</sup> C NMR of 2-{Fluoro[1-(4-methoxyphenyl)-1 <i>H</i> -1,2,3-triazol-4-yl]methylsulfonyl}benzo[d]-thiazole ( <b>4</b> ) | 23 |
| <sup>1</sup> H NMR of 2-[[1-(3-Phenylpropyl)-1 <i>H</i> -1,2,3-triazol-4-yl]methylsulfonyl]benzo[d]thiazole ( <b>5</b> )          | 24 |
| <sup>13</sup> C NMR of 2-[[1-(3-Phenylpropyl)-1 <i>H</i> -1,2,3-triazol-4-yl]methylsulfonyl]benzo[d]thiazole ( <b>5</b> )         | 25 |
| <sup>1</sup> H NMR of 2-{Fluoro[1-(3-phenylpropyl)-1 <i>H</i> -1,2,3-triazol-4-yl]methylsulfonyl}benzo[d]-thiazole ( <b>6</b> )   | 26 |
| <sup>13</sup> C NMR of 2-{Fluoro[1-(3-phenylpropyl)-1 <i>H</i> -1,2,3-triazol-4-yl]methylsulfonyl}benzo[d]-thiazole ( <b>6</b> )  | 27 |
| <sup>1</sup> H NMR of 2-[(1-Decyl-1 <i>H</i> -1,2,3-triazol-4-yl)methylsulfonyl]benzo[d]thiazole ( <b>7</b> )                     | 28 |
| <sup>13</sup> C NMR of 2-[(1-Decyl-1 <i>H</i> -1,2,3-triazol-4-yl)methylsulfonyl]benzo[d]thiazole ( <b>7</b> )                    | 29 |
| <sup>1</sup> H NMR of 2-[(1-Decyl-1 <i>H</i> -1,2,3-triazol-4-yl)fluoromethylsulfonyl]benzo[d]thiazole ( <b>8</b> )               | 30 |
| <sup>13</sup> C NMR of 2-[(1-Decyl-1 <i>H</i> -1,2,3-triazol-4-yl)fluoromethylsulfonyl]benzo[d]thiazole ( <b>8</b> )              | 31 |
| <sup>1</sup> H NMR of ( <i>E/Z</i> )- <b>9</b>                                                                                    | 32 |
| <sup>1</sup> H NMR of ( <i>E/Z</i> )- <b>10</b>                                                                                   | 33 |
| <sup>1</sup> H NMR of ( <i>E/Z</i> )- <b>11</b>                                                                                   | 34 |
| <sup>1</sup> H NMR of ( <i>E/Z</i> )- <b>12</b>                                                                                   | 35 |
| <sup>1</sup> H NMR of ( <i>E/Z</i> )- <b>13</b>                                                                                   | 36 |
| <sup>1</sup> H NMR of ( <i>E/Z</i> )- <b>14</b>                                                                                   | 37 |
| <sup>1</sup> H NMR of ( <i>E/Z</i> )- <b>15</b>                                                                                   | 38 |
| <sup>1</sup> H NMR of ( <i>E/Z</i> )- <b>16</b>                                                                                   | 39 |
| <sup>1</sup> H NMR of <b>17</b>                                                                                                   | 40 |
| <sup>1</sup> H NMR of ( <i>E/Z</i> )- <b>18</b>                                                                                   | 41 |
| <sup>1</sup> H NMR of ( <i>E/Z</i> )- <b>19</b>                                                                                   | 42 |
| <sup>1</sup> H NMR of ( <i>E/Z</i> )- <b>20</b>                                                                                   | 43 |
| <sup>1</sup> H NMR of ( <i>E/Z</i> )- <b>21</b>                                                                                   | 44 |
| <sup>1</sup> H NMR of ( <i>E/Z</i> )- <b>22</b>                                                                                   | 45 |
| <sup>1</sup> H NMR of ( <i>E/Z</i> )- <b>23</b>                                                                                   | 46 |
| <sup>1</sup> H NMR of ( <i>E/Z</i> )- <b>24</b>                                                                                   | 47 |
| <sup>1</sup> H NMR of ( <i>E/Z</i> )- <b>25</b>                                                                                   | 48 |
| <sup>1</sup> H NMR of <b>26</b>                                                                                                   | 49 |

---

## GENERAL EXPERIMENTAL METHODS

THF was distilled over  $\text{LiAlH}_4$ , and then over sodium. Toluene was distilled over sodium. DMF and DMPU were obtained from commercial sources and were used without further purification. For reactions, which were performed under a nitrogen atmosphere, glassware was flame dried under vacuum. LDA (2.0 M solution in heptane/THF/EtPh) and LHMDS (1.0 M in THF) were obtained from commercial sources. Fluorinating reagent *N*-fluorobenzenesulfonimide (NFSI) was a gift from Honeywell (Dr. Andrew Poss), but is also commercially available. Thin layer chromatography was performed on 250  $\mu\text{m}$  silica plates and column chromatographic purifications were performed on 200-300 mesh silica gel. All other reagents were obtained from commercial sources and used without further purification.  $^1\text{H}$  NMR spectra were recorded at 500 MHz in  $\text{CDCl}_3$ , acetone- $d_6$  and  $\text{C}_6\text{D}_6$ .  $^{19}\text{F}$  NMR spectra were recorded at 282 MHz using  $\text{CFCl}_3$  as internal standard. Chemical shifts ( $\delta$ ) are reported in parts per million and coupling constants ( $J$ ) are in hertz.

### 2-[3-(Trimethylsilyl)prop-2-ynylsulfonyl]benzo[*d*]thiazole (1)

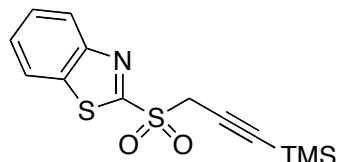

**Step 1: Synthesis of 2-[3-(trimethylsilyl)prop-2-ynylthio]benzo[*d*]thiazole.** To a solution of (3-bromoprop-1-ynyl)trimethylsilane (2.00 g, 10.5 mmol, 1 molar equiv) in DMF (40.0 mL) at room temperature, the sodium salt of 2-mercapto-1,3-benzothiazole (2.57 g, 13.6 mmol, 1.3 molar equiv) was added and the reaction mixture was stirred for 5 h. The reaction mixture was diluted with water and extracted with EtOAc (3x). The combined organic layer was thoroughly washed with water and then with brine and dried over anhydrous  $\text{Na}_2\text{SO}_4$ . The solvent was evaporated under reduced pressure to yield 2.81 g (97%) of crude 2-[3-(trimethylsilyl)prop-2-ynylthio]benzo[*d*]thiazole<sup>1</sup> as a light yellow solid, that was subjected to oxidation without further purification.  $^1\text{H}$  NMR (500 MHz,  $\text{CDCl}_3$ ):  $\delta$  7.90 (d, 1H, Ar-H,  $J = 7.8$  Hz), 7.78 (d, 1H, Ar-H,  $J = 7.8$  Hz), 7.43 (t, 1H, Ar-H,  $J = 7.8$  Hz), 7.32 (t, 1H, Ar-H,  $J = 7.6$  Hz), 4.16 (s, 2H,  $\text{CH}_2$ ), 0.15 (s, 9H,  $\text{SiMe}_3$ ).

**Step 2: Oxidation of 2-[3-(trimethylsilyl)prop-2-ynylthio]benzo[*d*]thiazole.** To a stirring solution of 2-[3-(trimethylsilyl)prop-2-ynylthio]benzo[*d*]thiazole (2.00 g, 7.22 mmol) in  $\text{CHCl}_3$

(30.0 mL) at  $-10\text{ }^{\circ}\text{C}$  (ice-salt) a solution of *m*-CPBA (3.74 g, 21.7 mmol, 3 molar equiv) in  $\text{CHCl}_3$  (55.0 mL) was added dropwise. After complete addition, the mixture was stirred for an additional 10 min at  $-10\text{ }^{\circ}\text{C}$ , allowed to warm to room temperature and stirred for 15 h. The reaction was quenched with 35 mL of saturated aqueous  $\text{NaHCO}_3$  solution, the organic layer was separated and the aqueous layer was extracted with  $\text{CH}_2\text{Cl}_2$  (3x). The combined organic layer was thoroughly washed with water and finally with brine and dried over anhydrous  $\text{Na}_2\text{SO}_4$ . The solvent was evaporated under reduced pressure to yield 2.19 g (98%) of 2-[3-(trimethylsilyl)prop-2-ynylsulfonyl]benzo[d]thiazole (**1**)<sup>1</sup> of crude product as an off-white solid that was subjected to fluorination without further purification.  $^1\text{H}$  NMR (500 MHz,  $\text{CDCl}_3$ ):  $\delta$  8.26 (d, 1H, Ar-H,  $J = 8.3$  Hz), 8.03 (d, 1H, Ar-H,  $J = 8.3$  Hz), 7.68-7.60 (m, 2H, Ar-H), 4.39 (s, 2H,  $\text{CH}_2$ ), 0.02 (s, 9H,  $\text{SiMe}_3$ ).  $^{13}\text{C}$  NMR (125 MHz,  $\text{CDCl}_3$ ):  $\delta$  164.1, 152.7, 137.4, 128.4, 127.9, 125.8, 122.4, 95.8, 90.8, 48.7,  $-0.5$ .

### 2-[1-Fluoro-3-(trimethylsilyl)prop-2-ynylsulfonyl]benzo[d]thiazole (**2**)

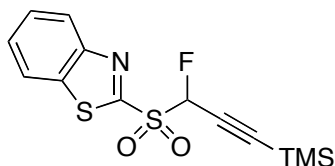

To a stirring solution of sulfone **1** (2.00 g, 6.47 mmol, 1 molar equiv) in dry toluene (40.0 mL) cooled to  $-78\text{ }^{\circ}\text{C}$  (dry ice/isopropanol) under nitrogen, LDA (1.1 molar equiv of a 2.0 M solution in heptane/THF/EtPh) was added. After 12 min, solid NFSI (2.45 g, 7.76 mmol, 1.2 molar equiv) was added. The reaction mixture was allowed to stir at  $-78\text{ }^{\circ}\text{C}$  for 50 min then warmed to room temperature and the stirring was continued for an additional 50 min. Saturated aq  $\text{NH}_4\text{Cl}$  was added to the reaction mixture and the layers were separated. The aqueous layer was extracted with EtOAc (3 x), and the combined organic layer was washed with water, saturated aq  $\text{NaHCO}_3$  and brine. The organic layer was dried over anhydrous  $\text{Na}_2\text{SO}_4$  and the solvent was evaporated under reduced pressure. The crude reaction mixture was rapidly purified by column chromatography ( $\text{SiO}_2$ , mesh 200-300, 10% EtOAc in hexanes) to yield 1.33 g (63%) of **2** as a white solid.  $^1\text{H}$  NMR (500 MHz,  $\text{CDCl}_3$ ):  $\delta$  8.29 (d, 1H, Ar-H,  $J = 8.3$  Hz), 8.05 (d, 1H, Ar-H,  $J = 7.8$  Hz), 7.69-7.63 (m, 2H, Ar-H), 6.12 (d, 1H, CHF,  $^2J_{\text{FH}} = 48.8$  Hz), 0.17 (s, 9H,  $\text{SiMe}_3$ ).  $^{13}\text{C}$  NMR (125 MHz,  $\text{CDCl}_3$ ):  $\delta$  160.9, 152.6, 137.6, 128.8, 128.0, 125.9, 122.3, 104.5 (d,  $^3J_{\text{CF}} = 8.2$  Hz), 91.8 (d,  $^1J_{\text{CF}} = 222.0$  Hz), 89.6 (d,  $^2J_{\text{CF}} = 23.4$  Hz), 0.9.  $^{19}\text{F}$  NMR (282 MHz,  $\text{CDCl}_3$ ):  $\delta$   $-164.6$  (d,  $^2J_{\text{FH}} = 48.8$  Hz). HRMS (ESI) calcd. for  $\text{C}_{13}\text{H}_{15}\text{FNO}_2\text{S}_2\text{Si}$  [ $\text{M} + \text{H}$ ]<sup>+</sup> 328.0292, found 328.0296.

## 2-(1-Fluoroprop-2-ynylsulfonyl)benzo[d]thiazole (2a)

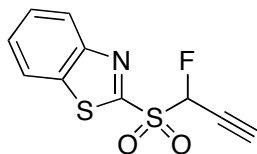

$^1\text{H}$  NMR (500 MHz,  $\text{CDCl}_3$ ):  $\delta$  8.29 (d, 1H, Ar-H,  $J = 8.3$  Hz), 8.05 (d, 1H, Ar-H,  $J = 7.4$  Hz), 7.70-7.63 (m, 2H, Ar-H), 6.21 (dd, 1H, CHF,  $^2J_{\text{FH}} = 48.1$  Hz,  $J_{\text{HH}} = 2.1$  Hz), 3.13 (dd, 1H,  $J = 5.8$ , 2.1 Hz).  $^{13}\text{C}$  NMR (125 MHz,  $\text{CDCl}_3$ ):  $\delta$  160.9, 152.9, 137.9, 128.9, 128.2, 126.2, 122.5, 91.4 (d,  $^1J_{\text{CF}} = 222.4$  Hz), 84.8 (d,  $^3J_{\text{CF}} = 9.6$  Hz), 70.0 (d,  $^2J_{\text{CF}} = 24.7$  Hz).  $^{19}\text{F}$  NMR (282 MHz,  $\text{CDCl}_3$ ):  $\delta$  -168.5 (d,  $^2J_{\text{FH}} = 45.8$  Hz). HRMS (ESI) calcd. for  $\text{C}_{10}\text{H}_7\text{FNO}_2\text{S}_2$  [ $\text{M} + \text{H}$ ] $^+$  255.9897, found 255.9898.

## Synthesis of Azides

4-Methoxyphenyl azide was prepared from the corresponding boronic acid.<sup>2</sup> Aliphatic azides were obtained from the corresponding halides by nucleophilic substitution.<sup>3,4</sup>

### 4-Methoxyphenyl Azide

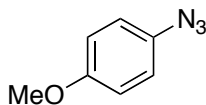

In a 10 mL round bottom flask, boronic acid (76.0 mg, 0.500 mmol, 1 molar equiv) was dissolved in 2.0 mL MeOH.  $\text{NaN}_3$  (39.0 mg, 0.600 mmol, 1.2 molar equiv) and  $\text{CuSO}_4 \cdot 5\text{H}_2\text{O}$  (12.5 mg, 0.050 mmol, 0.1 molar equiv) were added and the reaction mixture was stirred at room temperature in an open flask. After 5 h, the reaction mixture was filtered through a short silica plug and the product was eluted with  $\text{CH}_2\text{Cl}_2$  to yield 73.1 mg (98%) of 4-methoxyphenyl azide<sup>2</sup> as brownish oil.  $^1\text{H}$  NMR (500 MHz,  $\text{CDCl}_3$ ):  $\delta$  6.95 (d, 2H, Ar-H,  $J = 9.2$  Hz), 6.89 (d, 2H, Ar-H,  $J = 8.8$  Hz), 3.80 (s, 3H,  $\text{CH}_3$ ).

**General Procedure for Synthesis of Alkyl Azides.** To a stirring solution of alkyl halide (1 molar equiv) in DMF (70.0 mL), was added  $\text{NaN}_3$  (2 molar equiv). The reaction mixture was stirred at 80 °C for 7 h, cooled to room temperature, 20 mL of water was added and the mixture was poured into separatory funnel containing EtOAc. Organic layer was separated and the aqueous layer was extracted with EtOAc (3x), combined organic layer was washed with water

and brine, dried over anhydrous  $\text{Na}_2\text{SO}_4$  and the solvent was evaporated under reduced pressure. The alkyl azide obtained was used without further purification.

### 3-Phenylpropyl Azide<sup>3</sup>

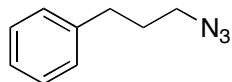

3-Phenylpropyl bromide: 1.00 g (5.02 mmol);  $\text{NaN}_3$ : 0.650 g (10.0 mmol). Yield: 700 mg (87%) of 3-phenylpropyl azide as a colorless oil.  $^1\text{H}$  NMR (500 MHz,  $\text{CDCl}_3$ ):  $\delta$  7.31 (t, 2H, Ar-H,  $J$  = 7.6 Hz), 7.23-7.19 (m, 3H, Ar-H), 3.29 (t, 2H,  $\text{CH}_2$ ,  $J$  = 6.9 Hz), 2.72 (t, 2H,  $\text{CH}_2$ ,  $J$  = 7.6 Hz), 1.96-1.90 (m, 2H,  $\text{CH}_2$ ).

### Decyl Azide<sup>4</sup>

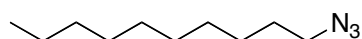

Decyl bromide: 0.500 g (2.26 mmol);  $\text{NaN}_3$ : 0.294 g (4.52 mmol). Yield: 172 mg (42%) of decyl azide as a colorless oil.  $^1\text{H}$  NMR (500 MHz,  $\text{CDCl}_3$ ):  $\delta$  3.25 (t, 2H,  $\text{CH}_2$ ,  $J$  = 6.9 Hz), 1.60 (m, 2H,  $\text{CH}_2$ ,  $J$  = 7.4 Hz), 1.27-1.63 (m, 14H,  $(\text{CH}_2)_7$ ), 0.88 (t, 3H,  $\text{CH}_3$ ,  $J$  = 7.4 Hz).

## Synthesis of Triazoles

**General Procedure.** To a stirring solution of azide (1 molar equiv) in 4:1 (v/v)  $\text{CH}_2\text{Cl}_2/\text{MeOH}$  (28.0 mL per mmol of azide), sulfone **1** or **2** (1 to 1.2 molar equiv),  $\text{Cu}(\text{CH}_3\text{CN})_4\text{PF}_6$  (0.20 molar equiv) and  $\text{AgBF}_4$  (0.20 molar equiv) were added sequentially. The stirring was continued at room temperature until TLC showed disappearance of the azide. The solvents were evaporated under reduced pressure and the crude reaction mixture was purified by column chromatography on silica gel (mesh 200-300). Eluting solvents for chromatography are indicated under the specific compound headings.

### 2-[[1-(4-Methoxyphenyl)-1H-1,2,3-triazol-4-yl]methylsulfonyl]benzo[d]thiazole (3)

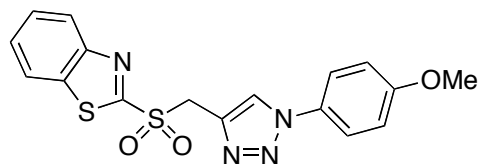

4-Methoxyphenyl azide: 250 mg (1.68 mmol); sulfone **1**: 624 mg (2.02 mmol). Column chromatography: eluting solvent 20% acetone in hexanes. Yield: 481 mg (74%) of off white solid.  $^1\text{H}$  NMR (500 MHz,  $\text{CDCl}_3$ ):  $\delta$  8.25 (d, 1H, Ar-H,  $J$  = 7.8 Hz), 8.14 (s, 1H), 7.97 (d, 1H, Ar-H,  $J$  = 7.8 Hz), 7.65 (t, 1H, Ar-H,  $J$  = 7.8 Hz), 7.61-7.58 (m, 3H, Ar-H), 7.02 (d, 2H, Ar-H,  $J$  = 8.8

Hz), 5.03 (s, 2H, CH<sub>2</sub>), 3.87 (s, 3H, CH<sub>3</sub>). <sup>13</sup>C NMR (125 MHz, CDCl<sub>3</sub>): δ 164.4, 160.4, 152.8, 137.3, 135.1, 130.3, 128.4, 128.0, 126.0, 123.3, 122.52, 122.47, 115.1, 55.9, 52.9. HRMS (ESI) calcd. for C<sub>17</sub>H<sub>15</sub>N<sub>4</sub>O<sub>3</sub>S<sub>2</sub> [M + H]<sup>+</sup> 387.0580, found 387.0582.

#### 2-{Fluoro[1-(4-methoxyphenyl)-1H-1,2,3-triazol-4-yl]methylsulfonyl}benzo[d]-thiazole (4)

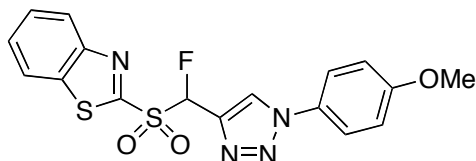

4-Methoxyphenyl azide: 300 mg (2.01 mmol); sulfone **2**: 723 mg (2.21 mmol). Column chromatography: eluting solvent 20% EtOAc in hexanes. Yield: 756 mg (93%) of white solid. <sup>1</sup>H NMR (500 MHz, CDCl<sub>3</sub>): δ 8.45 (d, 1H, Ar-H, *J* = 1.4 Hz), 8.32 (d, 1H, Ar-H, *J* = 8.3 Hz), 8.06 (d, 1H, Ar-H, *J* = 7.8 Hz), 7.71-7.64 (m, 4H, Ar-H), 7.05 (d, 2H, Ar-H, *J* = 8.7 Hz), 7.01 (d, 1H, CHF, <sup>2</sup>*J*<sub>FH</sub> = 46.1 Hz), 3.88 (s, 3H, OCH<sub>3</sub>). <sup>13</sup>C NMR (125 MHz, CDCl<sub>3</sub>): δ 162.0, 160.6, 153.0, 137.8, 135.7 (d, <sup>2</sup>*J*<sub>CF</sub> = 24.0 Hz), 129.9, 128.8, 128.2, 126.1, 124.1, 122.7, 122.5, 115.1, 96.1 (d, <sup>1</sup>*J*<sub>CF</sub> = 220.1 Hz), 55.9. <sup>19</sup>F NMR (282 MHz, CDCl<sub>3</sub>): δ -165.3 (d, <sup>2</sup>*J*<sub>FH</sub> = 45.8 Hz). HRMS (ESI) calcd. for C<sub>17</sub>H<sub>14</sub>FN<sub>4</sub>O<sub>3</sub>S<sub>2</sub> [M + H]<sup>+</sup> 405.0486, found 405.0489.

#### 2-[[1-(3-Phenylpropyl)-1H-1,2,3-triazol-4-yl]methylsulfonyl]benzo[d]thiazole (5)

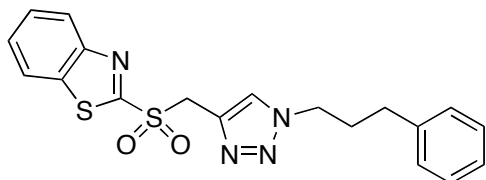

3-Phenylpropyl azide: 300 mg (1.86 mmol); sulfone **1**: 689 mg (2.23 mmol). Column chromatography: eluting solvent 40% EtOAc in hexanes. Yield: 623 mg (84%) of white solid. <sup>1</sup>H NMR (500 MHz, CDCl<sub>3</sub>): δ 8.22 (d, 1H, Ar-H, *J* = 8.3 Hz), 7.92 (d, 1H, Ar-H, *J* = 7.8 Hz), 7.73 (s, 1H, Ar-H), 7.62 (t, 1H, Ar-H, *J* = 7.6 Hz), 7.57 (t, 1H, Ar-H, *J* = 7.8 Hz), 7.30 (t, 2H, Ar-H, *J* = 7.6 Hz), 7.23 (t, 1H, Ar-H, *J* = 7.4 Hz), 7.14 (d, 1H, Ar-H, *J* = 7.8 Hz), 4.96 (s, 2H, CH<sub>2</sub>), 4.34 (t, 2H, CH<sub>2</sub>, *J* = 7.1 Hz), 2.60 (t, 2H, CH<sub>2</sub>, *J* = 7.6 Hz), 2.23 (quint, 2H, CH<sub>2</sub>, *J* = 7.4 Hz). <sup>13</sup>C NMR (125 MHz, CDCl<sub>3</sub>): δ 164.3, 152.8, 140.1, 137.2, 134.5, 128.8, 128.6, 128.3, 127.9, 126.6, 125.9, 125.0, 122.4, 52.9, 49.9, 32.5, 31.6. HRMS (ESI) calcd. for C<sub>19</sub>H<sub>19</sub>N<sub>4</sub>O<sub>2</sub>S<sub>2</sub> [M + H]<sup>+</sup> 399.0944, found 399.0943.

#### 2-{Fluoro[1-(3-phenylpropyl)-1H-1,2,3-triazol-4-yl]methylsulfonyl}benzo[d]-thiazole (6)

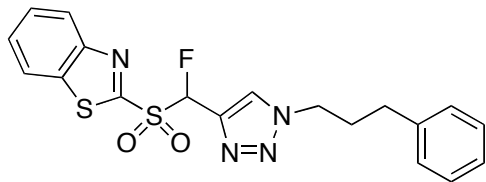

3-Phenylpropyl azide: 500 mg (3.10 mmol); sulfone **2**: 1.01 g (3.10 mmol). Column chromatography: eluting solvent 20% EtOAc in hexanes. Yield: 879 mg (68%) of white solid.  $^1\text{H}$  NMR (500 MHz,  $\text{CDCl}_3$ ):  $\delta$  8.27 (d, 1H, Ar-H,  $J = 8.3$  Hz), 8.08 (d, 1H, Ar-H,  $J = 1.8$  Hz), 8.01 (d, 1H, Ar-H,  $J = 7.8$  Hz), 7.68-7.61 (m, 2H, Ar-H), 7.30 (t, 2H, Ar-H,  $J = 7.6$  Hz), 7.22 (t, 1H, Ar-H,  $J = 7.4$  Hz), 7.17 (d, 2H, Ar-H,  $J = 7.4$  Hz), 6.94 (d, 1H, CHF,  $^2J_{\text{FH}} = 46.5$  Hz), 4.42 (t, 2H,  $\text{CH}_2$ ,  $J = 7.4$  Hz), 2.67 (t, 2H,  $\text{CH}_2$ ,  $J = 7.4$  Hz), 2.29 (quint, 2H,  $\text{CH}_2$ ,  $J = 7.4$  Hz).  $^{13}\text{C}$  NMR (125 MHz,  $\text{CDCl}_3$ ):  $\delta$  162.0, 153.0, 139.9, 137.7, 135.1 (d,  $^2J_{\text{CF}} = 24.2$  Hz), 128.9, 128.8, 128.6, 128.2, 126.7, 126.1, 125.8, 122.5, 96.2 (d,  $^1J_{\text{CF}} = 219.7$  Hz), 50.2, 32.5, 31.5.  $^{19}\text{F}$  NMR (282 MHz,  $\text{CDCl}_3$ ):  $\delta$  -165.4 (d,  $^2J_{\text{FH}} = 45.8$  Hz). HRMS (ESI) calcd. for  $\text{C}_{19}\text{H}_{18}\text{FN}_4\text{O}_2\text{S}_2$  [ $\text{M} + \text{H}$ ] $^+$  417.0850, found 417.0852.

### 2-[(1-Decyl-1H-1,2,3-triazol-4-yl)methylsulfonyl]benzo[d]thiazole (**7**)

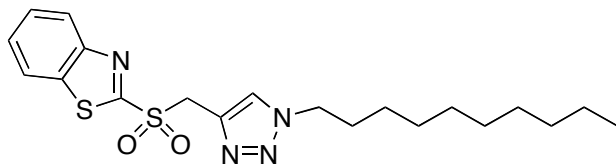

Decyl azide: 300 mg (1.64 mmol); sulfone **1**: 609 mg (1.97 mmol). Column chromatography: eluting solvent 20% EtOAc in hexanes. Yield: 555 mg (81%) of white solid.  $^1\text{H}$  NMR (500 MHz,  $\text{CDCl}_3$ ):  $\delta$  8.22 (d, 1H, Ar-H,  $J = 8.2$  Hz), 7.95 (d, 1H, Ar-H,  $J = 8.2$  Hz), 7.75 (s, 1H, Ar-H), 7.63 (t, 1H, Ar-H,  $J = 7.2$  Hz), 7.57 (t, 1H, Ar-H,  $J = 7.4$  Hz), 4.95 (s, 2H,  $\text{CH}_2$ ), 4.32 (t, 2H,  $\text{CH}_2$ ,  $J = 7.2$  Hz), 1.89-1.83 (m, 2H,  $\text{CH}_2$ ), 1.28-1.25 (m, 14H,  $(\text{CH}_2)_7$ ), 0.87 (t, 3H,  $\text{CH}_3$ ,  $J = 6.9$  Hz).  $^{13}\text{C}$  NMR (125 MHz,  $\text{CDCl}_3$ ):  $\delta$  164.4, 152.8, 137.3, 134.4, 128.4, 127.9, 125.9, 124.8, 122.4, 52.9, 50.8, 32.0, 30.3, 29.64, 29.6, 29.4, 29.1, 26.6, 22.8, 14.3. HRMS (ESI) calcd. for  $\text{C}_{20}\text{H}_{29}\text{N}_4\text{O}_2\text{S}_2$  [ $\text{M} + \text{H}$ ] $^+$  421.1726, found 421.173.

### 2-[(1-Decyl-1H-1,2,3-triazol-4-yl)fluoromethylsulfonyl]benzo[d]thiazole (**8**)

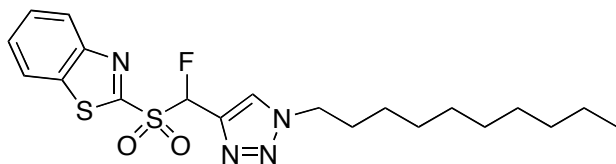



Decyl azide: 91.6 mg (0.500 mmol); sulfone **2**: 164 mg (0.500 mmol). Column chromatography: eluting solvent 20% EtOAc in hexanes. Yield: 178 mg (81%) of white solid.  $^1\text{H}$  NMR (500 MHz,  $\text{CDCl}_3$ ):  $\delta$  8.30 (d, 1H, Ar-H,  $J = 8.3$  Hz), 8.09 (d, 1H, Ar-H,  $J = 1.8$  Hz), 8.05 (d, 1H, Ar-H,  $J = 7.8$  Hz), 7.70-7.63 (m, 2H, Ar-H), 6.93 (d, 1H, CHF,  $^2J_{\text{FH}} = 46.5$  Hz), 4.48-4.38 (m, 2H,  $\text{CH}_2$ ), 1.98-1.93 (m, 2H,  $\text{CH}_2$ ), 1.34-1.26 (m, 14H,  $(\text{CH}_2)_7$ ), 0.88 (t, 3H,  $\text{CH}_3$ ,  $J = 6.9$  Hz).  $^{13}\text{C}$  NMR (125 MHz,  $\text{CDCl}_3$ ):  $\delta$  162.0, 153.0, 137.7, 135.1 (d,  $^2J_{\text{CF}} = 24.3$  Hz), 128.8, 128.2, 126.1, 125.6, 122.5, 96.2 (d,  $^1J_{\text{CF}} = 219.7$  Hz), 51.2, 32.0, 30.3, 29.6, 29.5, 29.4, 29.1, 26.6, 22.8, 14.3.  $^{19}\text{F}$  NMR (282 MHz,  $\text{CDCl}_3$ ):  $\delta$  -165.0 (d,  $^2J_{\text{FH}} = 46.1$  Hz). HRMS (ESI) calcd. for  $\text{C}_{20}\text{H}_{28}\text{FN}_4\text{O}_2\text{S}_2$  [ $\text{M} + \text{H}$ ] $^+$  439.1632, found 439.1635.

### Competitive Click Reaction

**General Procedure.** To a stirring solution of azide (0.155 mmol, 1 molar equiv) in 4:1  $\text{CH}_2\text{Cl}_2/\text{MeOH}$  solvent (4.5 mL), sulfones **1** and **2** (0.31 mmol each, 2 molar equiv each),  $\text{Cu}(\text{CH}_3\text{CN})_4\text{PF}_6$  (46.0 mg, 0.124 mmol, 0.8 molar equiv) and  $\text{AgBF}_4$  (24.1 mg, 0.124 mmol, 0.8 molar equiv) were added sequentially. The stirring was continued at room temperature until TLC showed disappearance of the azide. The solvents were evaporated under reduced pressure and the crude reaction mixture was analyzed by  $^1\text{H}$  NMR (500 MHz) using  $\text{CDCl}_3$  as solvent.

### Synthesis of Vinyl Triazoles

**General Procedure.** A stirring solution of aldehyde (0.5 mmol, 1 molar equiv) and triazole (0.6 mmol, 1.2 molar equiv) in DMF (3.8 mL) and DMPU (3.8 mL) was cooled to  $-78$  °C (dry ice/*iso*-PrOH) and under nitrogen LHMDS (1.2 mmol, 2.4 molar equiv) was added to the reaction mixture. The reaction mixture was stirred at  $-78$  °C for 5 min, saturated aq  $\text{NH}_4\text{Cl}$  was added and the mixture was poured into EtOAc. Organic layer was separated and the aqueous layer was extracted with EtOAc three times. The combined organic layer was washed with water and brine and dried over anhydrous  $\text{Na}_2\text{SO}_4$ . The solvent was evaporated under reduced pressure and the combined *E/Z* product mixture was isolated by column chromatography using silica gel (mesh 200-300). The product *E/Z* ratio was determined by  $^1\text{H}$  NMR for vinyl and by  $^{19}\text{F}$  NMR for fluorovinyl derivatives, prior to column chromatography purification. Eluting solvent for chromatography, HRMS and  $^{19}\text{F}$  NMR data (for fluorovinyl derivatives) of products are displayed

for each individual substrate in the Table. For all compounds shown in the Table,  $^{19}\text{F}$  NMR spectra were recorded in  $\text{CDCl}_3$  solvent, at 282 MHz using  $\text{CFCl}_3$  as internal standard.

**Table 1** Eluting solvents for column chromatography, HRMS data of compounds **9** to **26** and  $^{19}\text{F}$  NMR data of compounds **18** to **26**

| Compound                                                                                                   | Eluting solvent      | HRMS and $^{19}\text{F}$ NMR data where applicable                                                                       |
|------------------------------------------------------------------------------------------------------------|----------------------|--------------------------------------------------------------------------------------------------------------------------|
| 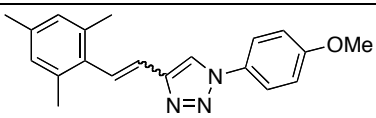 <p><b>(E/Z)-9</b></p>    | 20% EtOAc in hexanes | HRMS (ESI) calcd. for $\text{C}_{20}\text{H}_{22}\text{N}_3\text{O}$ $[\text{M}+\text{H}]^+$ 320.1757, found 320.176.    |
|  <p><b>(E/Z)-10</b></p>   | 20% EtOAc in hexanes | HRMS (ESI) calcd. for $\text{C}_{22}\text{H}_{26}\text{N}_3$ $[\text{M}+\text{H}]^+$ 332.2121, found 332.2126.           |
|  <p><b>(E/Z)-11</b></p>   | 40% EtOAc in hexanes | HRMS (ESI) calcd. for $\text{C}_{20}\text{H}_{22}\text{N}_3\text{O}$ $[\text{M}+\text{H}]^+$ 320.1757, found 320.1761.   |
|  <p><b>(E/Z)-12</b></p>  | 40% EtOAc in hexanes | HRMS (ESI) calcd. for $\text{C}_{19}\text{H}_{19}\text{N}_4\text{O}_2$ $[\text{M}+\text{H}]^+$ 335.1503, found 335.1506. |
|  <p><b>(E/Z)-13</b></p> | 20% EtOAc in hexanes | HRMS (ESI) calcd. for $\text{C}_{16}\text{H}_{22}\text{N}_3\text{O}$ $[\text{M}+\text{H}]^+$ 272.1757, found 272.1757.   |
|  <p><b>(E/Z)-14</b></p> | 20% EtOAc in hexanes | HRMS (ESI) calcd. for $\text{C}_{18}\text{H}_{26}\text{N}_3$ $[\text{M}+\text{H}]^+$ 284.2121, found 284.2124.           |
|  <p><b>(E/Z)-15</b></p> | 20% EtOAc in hexanes | HRMS (ESI) calcd. for $\text{C}_{18}\text{H}_{26}\text{N}_3\text{O}$ $[\text{M}+\text{H}]^+$ 300.2070, found 300.2071.   |
|  <p><b>(E/Z)-16</b></p> | 20% EtOAc in hexanes | HRMS (ESI) calcd. for $\text{C}_{20}\text{H}_{30}\text{N}_3$ $[\text{M}+\text{H}]^+$ 312.2434, found 312.2437.           |
|  <p><b>17</b></p>       | 40% EtOAc in hexanes | HRMS (ESI) calcd. for $\text{C}_{24}\text{H}_{29}\text{N}_4$ $[\text{M}+\text{H}]^+$ 373.2387, found 373.2394.           |

|                                                                                                        |                      |                                                                                                                                                                                                                                                                                                |
|--------------------------------------------------------------------------------------------------------|----------------------|------------------------------------------------------------------------------------------------------------------------------------------------------------------------------------------------------------------------------------------------------------------------------------------------|
| 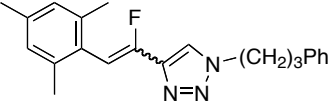<br><b>(E/Z)-18</b>   | 20% EtOAc in hexanes | $^{19}\text{F}$ NMR: $\delta$ -114.2 (d, $^3J_{\text{FH}} = 18.4$ Hz, <i>E</i> isomer), $\delta$ -115.5 (d, $^3J_{\text{FH}} = 42.6$ Hz, <i>Z</i> isomer).<br>HRMS (ESI) calcd. for $\text{C}_{22}\text{H}_{25}\text{FN}_3$ [ $\text{M} + \text{H}$ ] $^+$ 350.2027, found 350.2034.           |
| <br><b>(E/Z)-19</b>   | 20% EtOAc in hexanes | $^{19}\text{F}$ NMR: $\delta$ -108.5 (d, $^3J_{\text{FH}} = 21.4$ Hz, <i>E</i> isomer), $\delta$ -121.5 (d, $^3J_{\text{FH}} = 42.7$ Hz, <i>Z</i> isomer).<br>HRMS (ESI) calcd. for $\text{C}_{18}\text{H}_{17}\text{FN}_3\text{O}_2$ [ $\text{M} + \text{H}$ ] $^+$ 326.1299, found 326.1304. |
| <br><b>(E/Z)-20</b>   | 40% EtOAc in hexanes | $^{19}\text{F}$ NMR: $\delta$ -108.2 (d, $^3J_{\text{FH}} = 21.4$ Hz, <i>E</i> isomer), $\delta$ -121.3 (d, $^3J_{\text{FH}} = 42.7$ Hz, <i>Z</i> isomer).<br>HRMS (ESI) calcd. for $\text{C}_{20}\text{H}_{21}\text{FN}_3\text{O}$ [ $\text{M} + \text{H}$ ] $^+$ 338.1663, found 338.1667.   |
| <br><b>(E/Z)-21</b>   | 20% EtOAc in hexanes | $^{19}\text{F}$ NMR: $\delta$ -100.6 (d, $^3J_{\text{FH}} = 21.4$ Hz, <i>E</i> isomer), $\delta$ -113.4 (d, $^3J_{\text{FH}} = 39.7$ Hz, <i>Z</i> isomer).<br>HRMS (ESI) calcd. for $\text{C}_{19}\text{H}_{18}\text{FN}_4\text{O}_2$ [ $\text{M} + \text{H}$ ] $^+$ 353.1408, found 353.1411. |
| <br><b>(E/Z)-22</b>  | 20% EtOAc in hexanes | $^{19}\text{F}$ NMR: $\delta$ -114.3 (d, $^3J_{\text{FH}} = 24.4$ Hz, <i>E</i> isomer), $\delta$ -124.7 (d, $^3J_{\text{FH}} = 39.7$ Hz, <i>Z</i> isomer).<br>HRMS (ESI) calcd. for $\text{C}_{16}\text{H}_{21}\text{FN}_3\text{O}$ [ $\text{M} + \text{H}$ ] $^+$ 290.1663, found 290.1666.   |
| <br><b>(E/Z)-23</b> | 20% EtOAc in hexanes | $^{19}\text{F}$ NMR: $\delta$ -114.0 (d, $^3J_{\text{FH}} = 24.4$ Hz, <i>E</i> isomer), $\delta$ -124.6 (d, $^3J_{\text{FH}} = 39.7$ Hz, <i>Z</i> isomer).<br>HRMS (ESI) calcd. for $\text{C}_{18}\text{H}_{25}\text{FN}_3$ [ $\text{M} + \text{H}$ ] $^+$ 302.2027, found 302.2031.           |
| <br><b>(E/Z)-24</b> | 20% EtOAc in hexanes | $^{19}\text{F}$ NMR: $\delta$ -115.6 (d, $^3J_{\text{FH}} = 21.4$ Hz, <i>E</i> isomer), $\delta$ -124.6 (d, $^3J_{\text{FH}} = 39.7$ Hz, <i>Z</i> isomer).<br>HRMS (ESI) calcd. for $\text{C}_{18}\text{H}_{25}\text{FN}_3\text{O}$ [ $\text{M} + \text{H}$ ] $^+$ 318.1976, found 318.1983.   |
| <br><b>(E/Z)-25</b> | 20% EtOAc in hexanes | $^{19}\text{F}$ NMR: $\delta$ -115.3 (d, $^3J_{\text{FH}} = 21.4$ Hz, <i>E</i> isomer), $\delta$ -124.5 (d, $^3J_{\text{FH}} = 36.6$ Hz, <i>Z</i> isomer).<br>HRMS (ESI) calcd. for $\text{C}_{20}\text{H}_{28}\text{FN}_3\text{Na}$ [ $\text{M} + \text{Na}$ ] $^+$ 352.2159, found 352.2161. |
| <br><b>26</b>       | 40% EtOAc in hexanes | $^{19}\text{F}$ NMR: $\delta$ -122.0 (s).<br>HRMS (ESI) calcd. for $\text{C}_{22}\text{H}_{24}\text{FN}_4\text{O}$ [ $\text{M} + \text{H}$ ] $^+$ 379.1929, found 379.1924.                                                                                                                    |

### Data from DFT Computational Analysis

All quantum mechanical calculations were done using Density Functional Theory (DFT) method based on Becke3-Lee-Yang-Parr (B3LYP) level with 6-311++G(2d,2p) basis sets available with Gaussian 9 programs.<sup>5</sup> Initial geometries of the protio- and the fluoro-analogue (structures shown in Table 2) were first optimized. The optimized coordinates were then utilized for further calculations to estimate the energies of the HOMO and LUMO. Visualizations of molecular orbitals and estimation of their energy were performed using a personal computer-based GaussView 4.1.2 program.<sup>6</sup> GaussView 4 generated the MOs from the checkpoint files and extracted the relevant energies in Hartree which was then converted to kcal/mol. Natural bond orbital (NBO) analyses<sup>7</sup> were performed on the optimized geometries to calculate atom-atom overlap-weighted natural atomic orbital (NAO) bond orders and the natural charges.

**Table 2** HOMO and LUMO energies of benzothiazolyl propargyl sulfone and benzothiazolyl fluoropropargyl sulfone

|      | 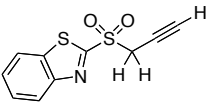 |  |
|------|------------------------------------------------------------------------------------|--------------------------------------------------------------------------------------|
|      | Energy (kcal/mol)                                                                  | Energy (kcal/mol)                                                                    |
| LUMO | -53.1                                                                              | -56.8                                                                                |
| HOMO | -167.6                                                                             | -167.8                                                                               |

**Table 3** NBO analyzed natural charges of benzothiazolyl propargyl sulfone and benzothiazolyl fluoropropargyl sulfone

| 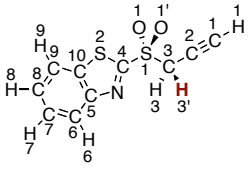 |                              |  |                              |
|-------------------------------------------------------------------------------------|------------------------------|--------------------------------------------------------------------------------------|------------------------------|
| Atom Number                                                                         | NBO Analyzed Natural Charges | Atom Number                                                                          | NBO Analyzed Natural Charges |
| H1                                                                                  | 0.230                        | H1                                                                                   | 0.232                        |
| C1                                                                                  | -0.162                       | C1                                                                                   | -0.110                       |
| C2                                                                                  | -0.050                       | C2                                                                                   | -0.101                       |
| C3                                                                                  | -0.636                       | C3                                                                                   | -0.004                       |
| H3                                                                                  | 0.252                        | H3                                                                                   | 0.228                        |

|     |        |     |        |
|-----|--------|-----|--------|
| H3' | 0.266  | F   | -0.353 |
| S1  | 2.063  | S1  | 2.027  |
| O1  | -0.881 | O1  | -0.878 |
| O1' | -0.908 | O1' | -0.889 |
| C4  | -0.186 | C4  | -0.191 |
| N   | -0.444 | N   | -0.436 |
| S2  | 0.464  | S2  | 0.474  |
| C5  | 0.101  | C5  | 0.102  |
| C6  | -0.175 | C6  | -0.173 |
| H6  | 0.223  | H6  | 0.223  |
| C7  | -0.200 | C7  | -0.199 |
| H7  | 0.211  | H7  | 0.211  |
| C8  | -0.182 | C8  | -0.180 |
| H8  | 0.211  | H8  | 0.211  |
| C9  | -0.211 | C9  | -0.211 |
| H9  | 0.218  | H9  | 0.218  |
| C10 | -0.205 | C10 | -0.203 |

#### References:

- 1 C. Bonini, L. Chiummiento and V. Videtta, *Synlett*, 2005, 3067.
- 2 C.-Z. Tao, X. Cui, J. Li, A.-X. Liu, L. Liu and Q.-X. Guo, *Tetrahedron Lett.*, 2007, **48**, 3525.
- 3 G. Colombano, C. Travelli, U. Galli, A. Caldarelli, M. G. Chini, P. L. Canonico, G. Sorba, G. Bifulco, G. C. Tron and A. A. Genazzani, *J. Med. Chem.*, 2010, **53**, 616.
- 4 L. Daz, J. Bujons, J. Casas, A. Llebaria and A. Delgado, *J. Med. Chem.*, 2010, **53**, 5248.
- 5 M. J. Frisch et al., Gaussian 09, Revision A.02, Gaussian, Inc., Wallingford, CT, 2009.
- 6 R. Dennington II, T. Keith and J. Millam, GaussView, Version 4.1.2, Semichem, Inc., Shawnee Mission, KS, 2007.
- 7 F. Weinhold and J. E. Carpenter, in *The Structure of Small Molecules and Ions*, ed. R. Naaman and Z. Vager, Plenum, New York, 1988, p. 227.

1222-RK-02-139-pure

Archive directory: /export/home/mkl/vnmrsys/data  
Sample directory: auto\_13Dec2004

Pulse Sequence: s2pul

Solvent: cdcl3  
Temp. 25.0 C / 298.1 K  
Operator: Barbara  
File: 1222-RK-02-139-pure  
INOVA-500 "r1ga"

Relax. delay 1.000 sec  
Pulse 45.0 degrees  
Acq. time 1.892 sec  
Width 7544.3 Hz  
24 repetitions  
OBSERVE H1, 499.7707221 MHz  
DATA PROCESSING  
Line broadening 0.1 Hz  
FT size 32768  
Total time 3 min, 5 sec

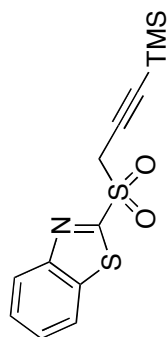

1

500 MHz, CDCl<sub>3</sub>

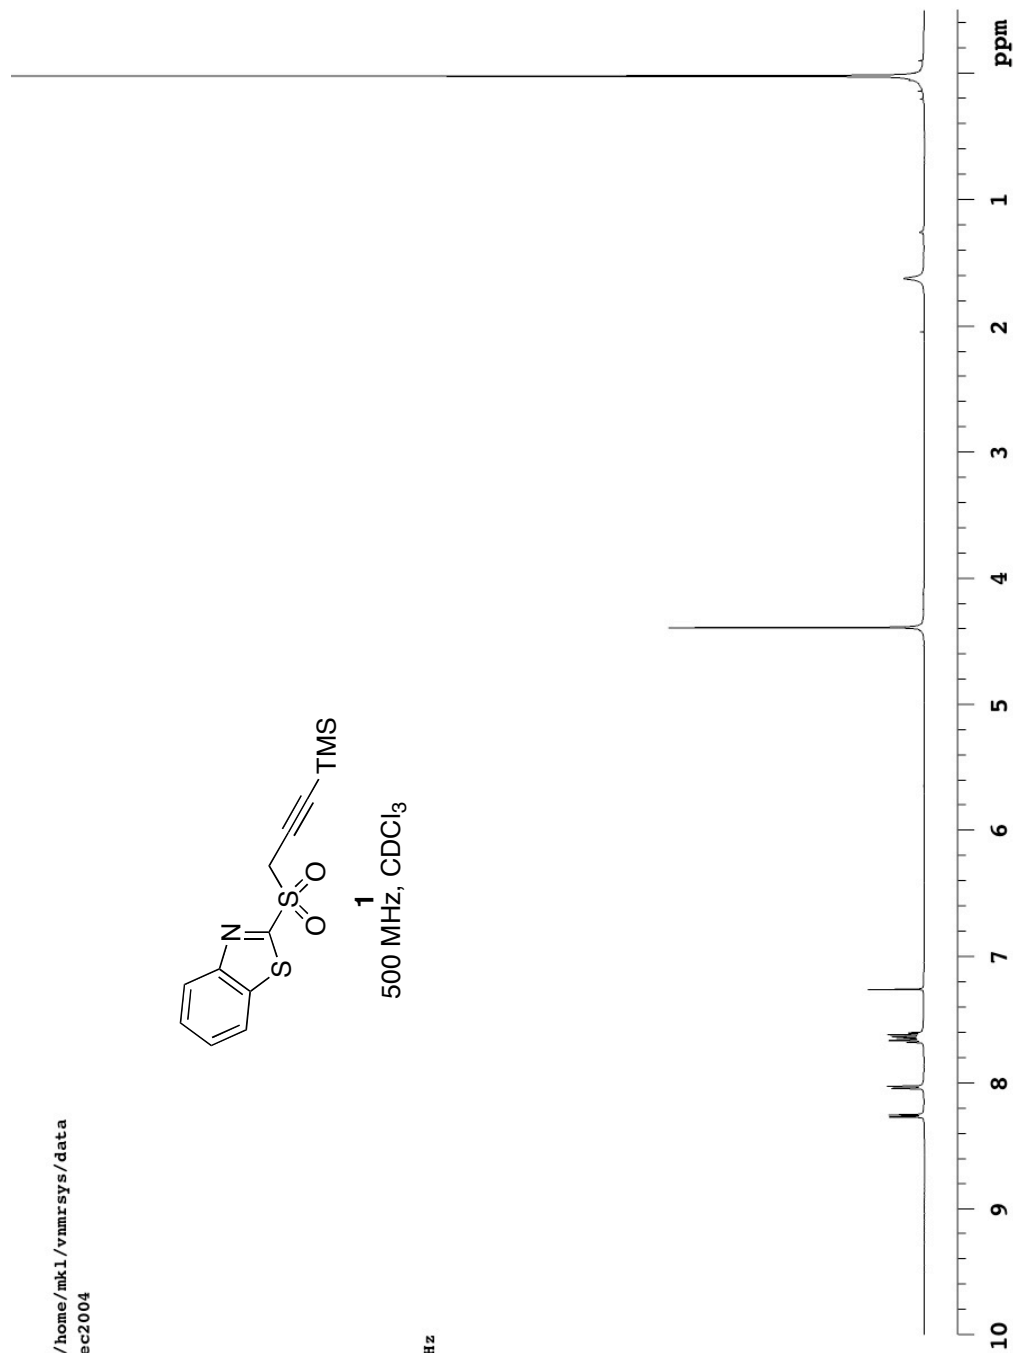

1222-RK-02-139-13C

Pulse Sequence: s2pul

Solvent: CDCl<sub>3</sub>

Temp. 25.0 C / 298.1 K

Operator: Barbara

INOVA-500 "capella500"

Relax. delay 4.000 sec

Pulse 52.1 degrees

Acq. time 1.300 sec

Width 29996.3 Hz

52 repetitions

OBSERVE C13, 125.6674264 MHz

DECOUPLE H1, 499.7732084 MHz

Power 42 dB

on during acquisition

WALTZ-16 modulated

DATA PROCESSING

Line broadening 1.0 Hz

FT size 131072

Total time 18 min, 3 sec

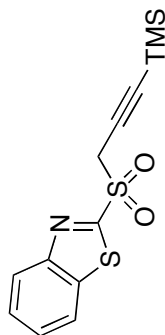

1

125 MHz, CDCl<sub>3</sub>

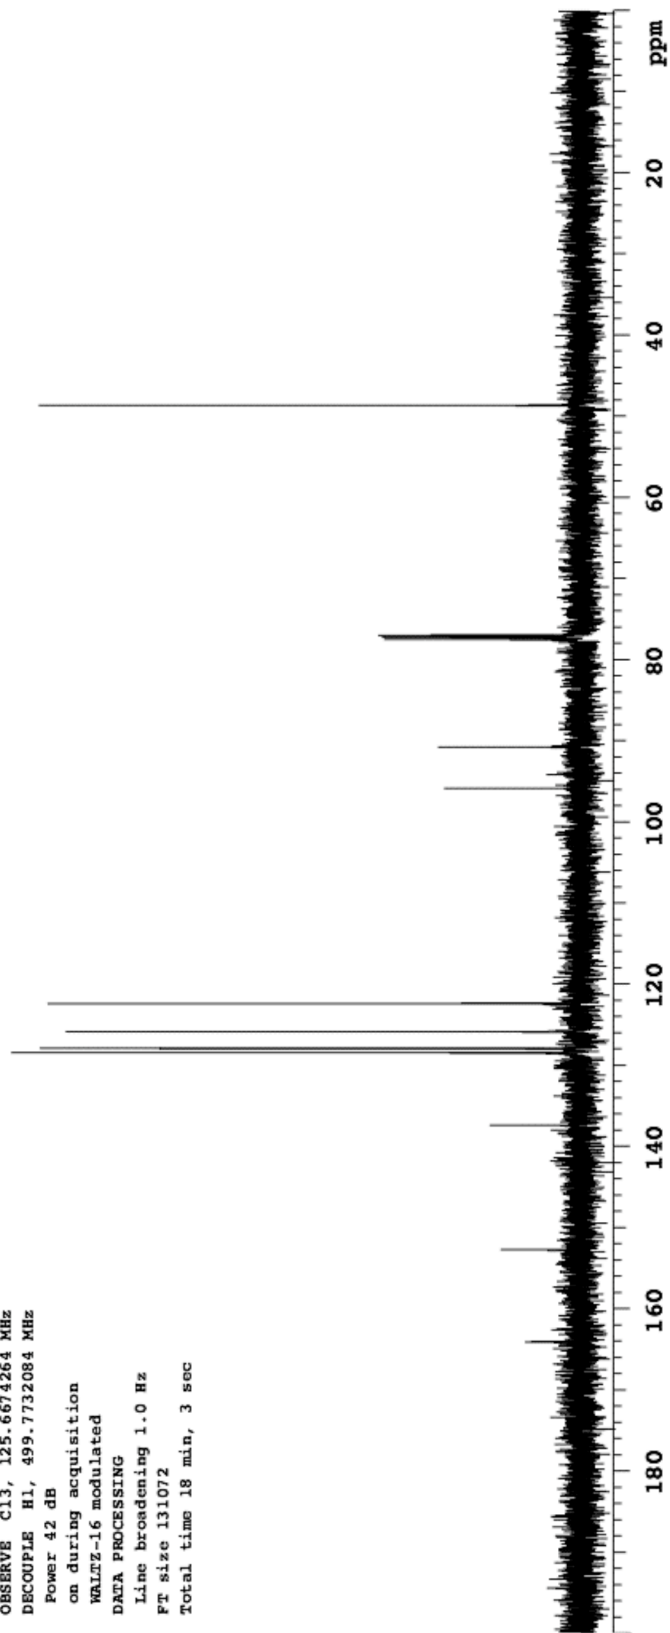

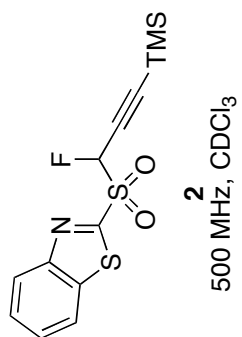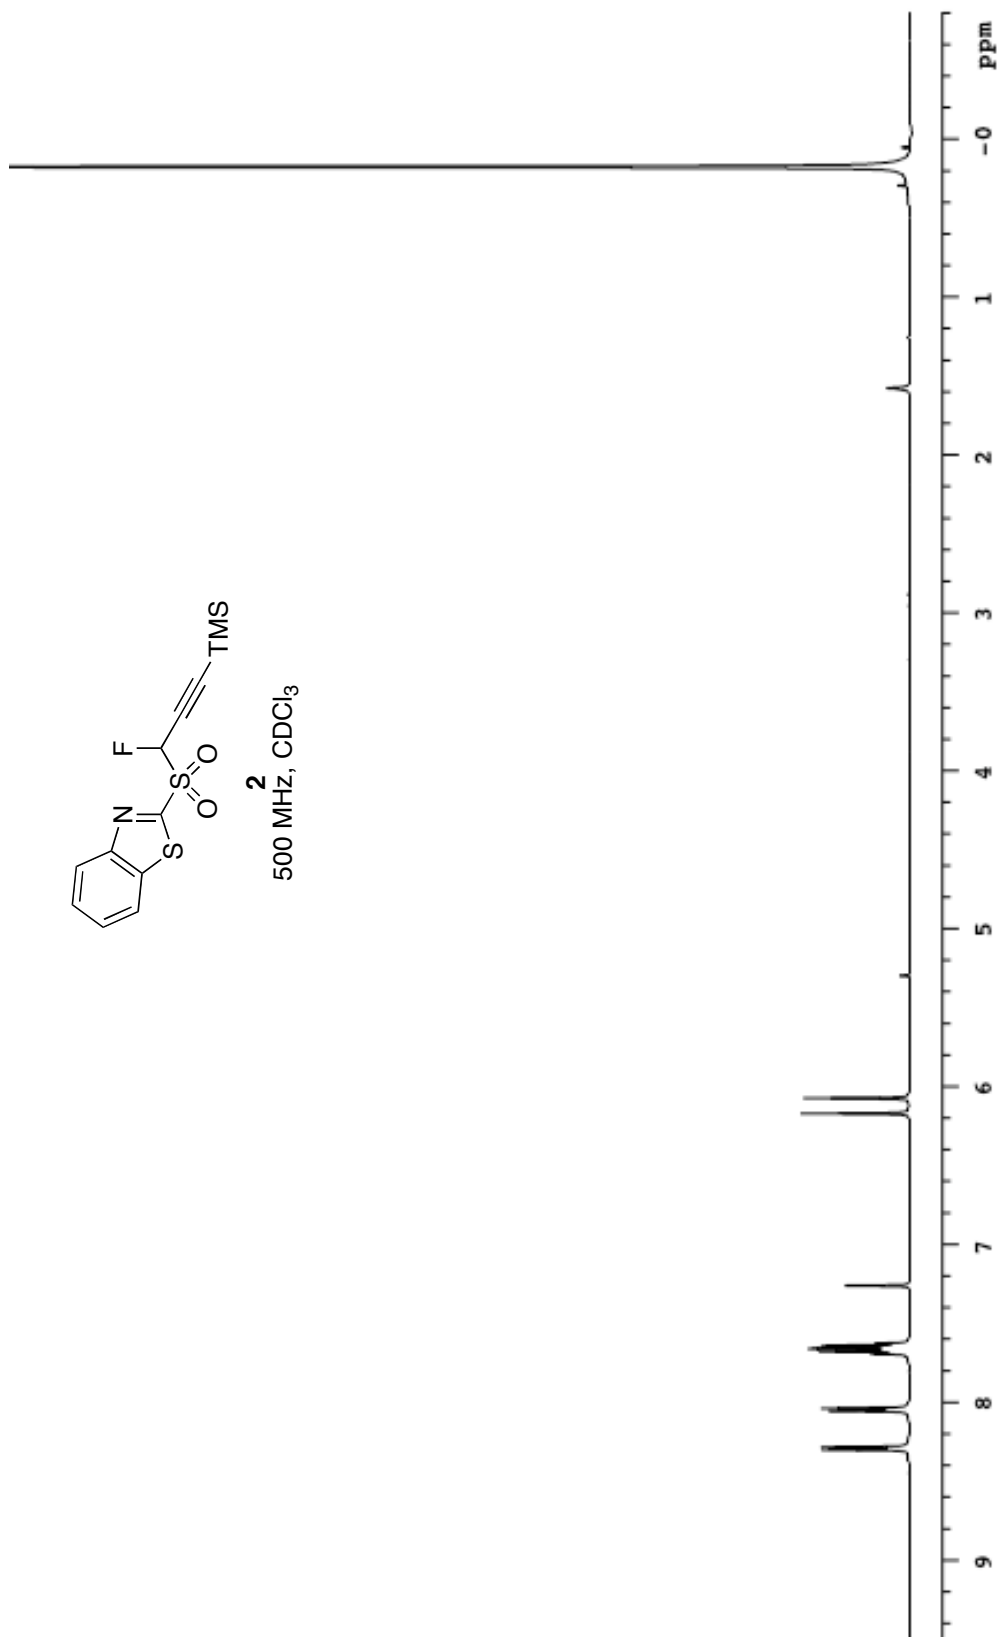



1222-RK-02-144-13C

Pulse Sequence: s2pul

Solvent: CDCl3

Temp. 25.0 C / 298.1 K

Operator: Barbara

File: 1222-RK-02-144-13C

INOVA-500 "riga"

Relax. delay 4.000 sec

Pulse 52.1 degrees

Acq. time 1.300 sec

Width 29996.3 Hz

100 repetitions

OBSERVE C13, 125.6674411 MHz

DECOUPLE H1, 499.7732084 MHz

Power 42 dB

on during acquisition

WALTZ-16 modulated

DATA PROCESSING

Line broadening 1.0 Hz

FT size 131072

Total time 9 min, 12 sec

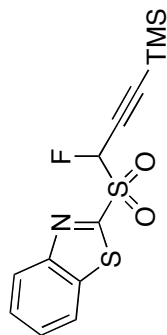

**2**

125 MHz, CDCl<sub>3</sub>

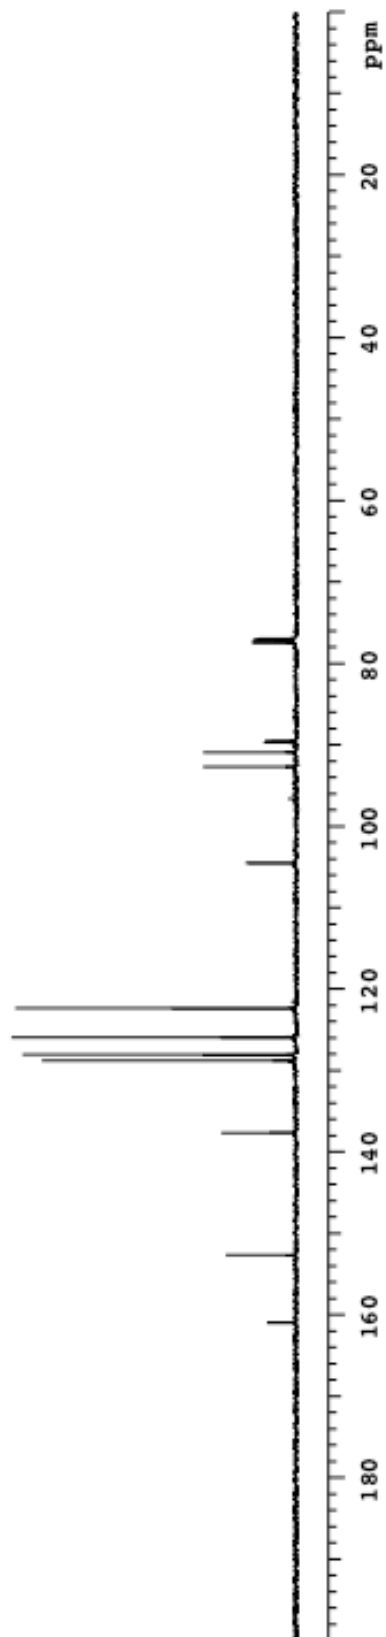

1222-MK-02-117-crude

Archive directory: /export/home/mkl/vmarsys/data  
Sample directory: ato\_13Dec2004  
File: 1222-MK-02-117-crude

Pulse Sequence: s2pul

Solvent: cdcl3  
Temp. 25.0 C / 298.1 K  
Operator: Barbara  
File: 1222-MK-02-117-crude  
INOVA-500 "capella500"

Relax. delay 1.000 sec  
Pulse 45.0 degrees  
Acq. time 1.892 sec  
Width 7544.3 Hz  
64 repetitions

OBSERVE H1, 499.7707212 MHz

DATA PROCESSING

Line broadening 0.0 Hz  
FT size 32768  
Total time 3 min, 5 sec

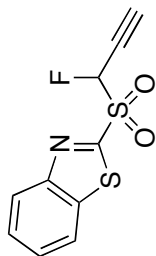

**2a**  
Crude product  
500 MHz, CDCl<sub>3</sub>

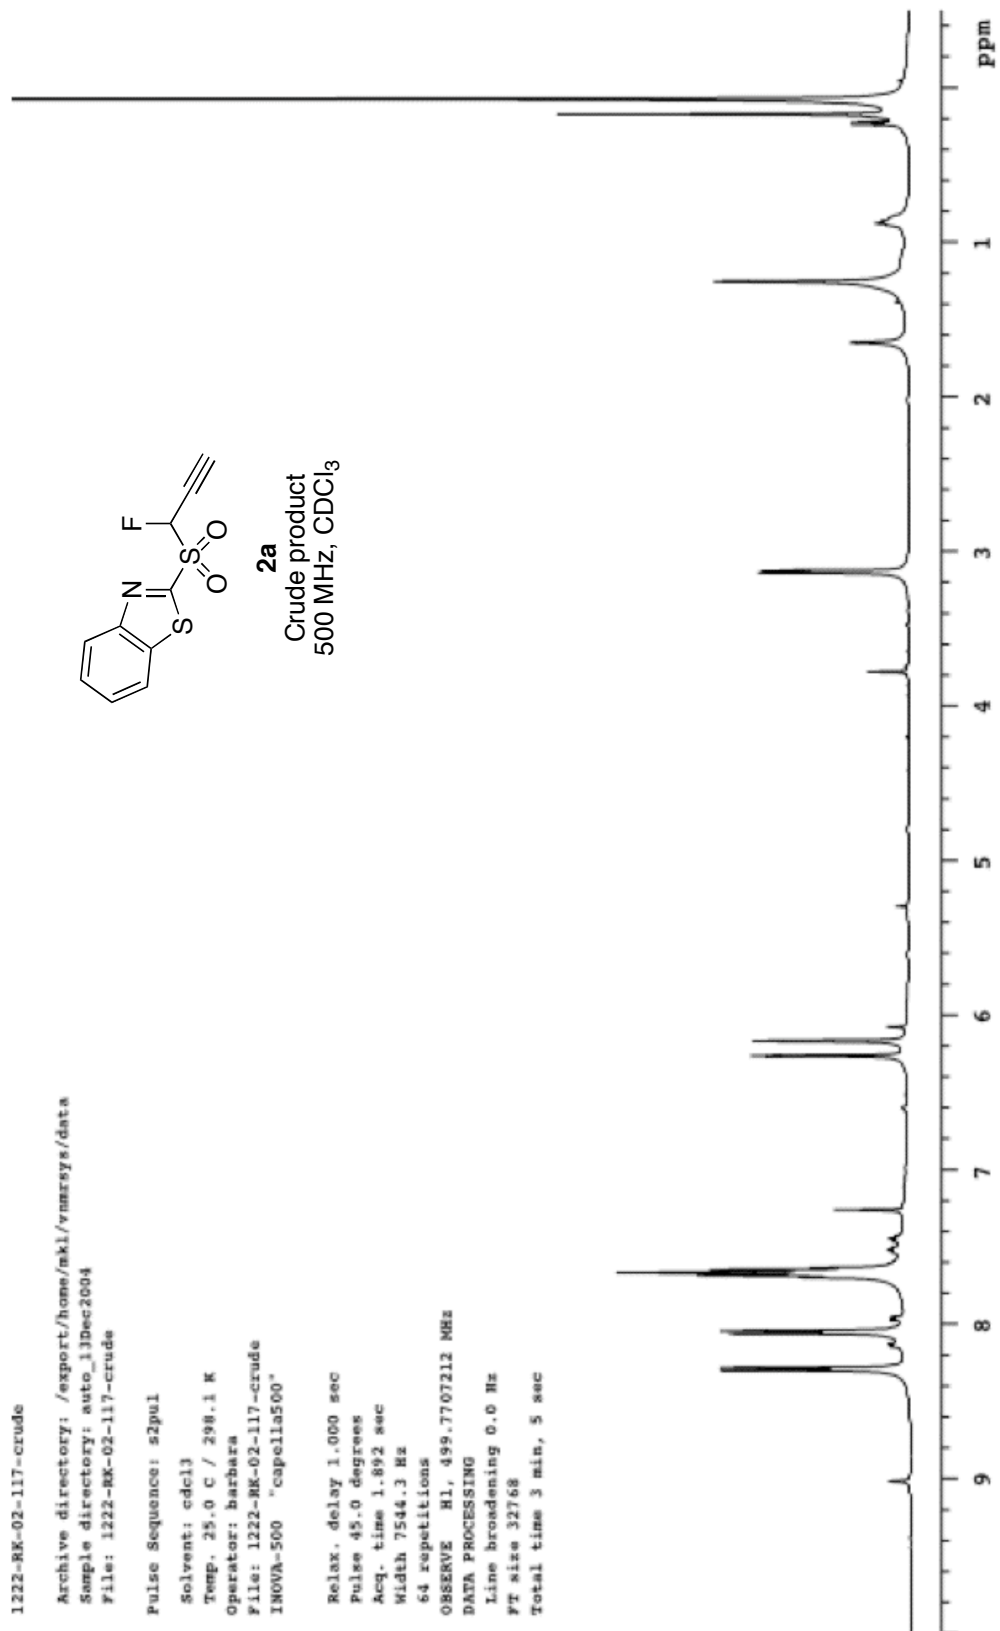

1222-RK-02-117-13C

Pulse Sequence: s2pul

Solvent: CDCl<sub>3</sub>  
Temp. 25.0 C / 298.1 K  
Operator: barbara  
INOVA-500 "capella500"

Relax. delay 4.000 sec  
Pulse 52.1 degrees  
Acq. time 1.300 sec  
Width 29996.3 Hz  
696 repetitions  
OBSERVE C13, 125.6674205 MHz  
DECOUPLE H1, 499.7732084 MHz  
Power 42 dB  
on during acquisition  
WALTZ-16 modulated  
DATA PROCESSING  
Line broadening 1.0 Hz  
FT size 131072  
Total time 2 hr, 57 min, 20 sec

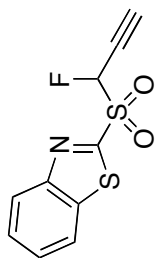

**2a**  
Crude product  
125 MHz, CDCl<sub>3</sub>

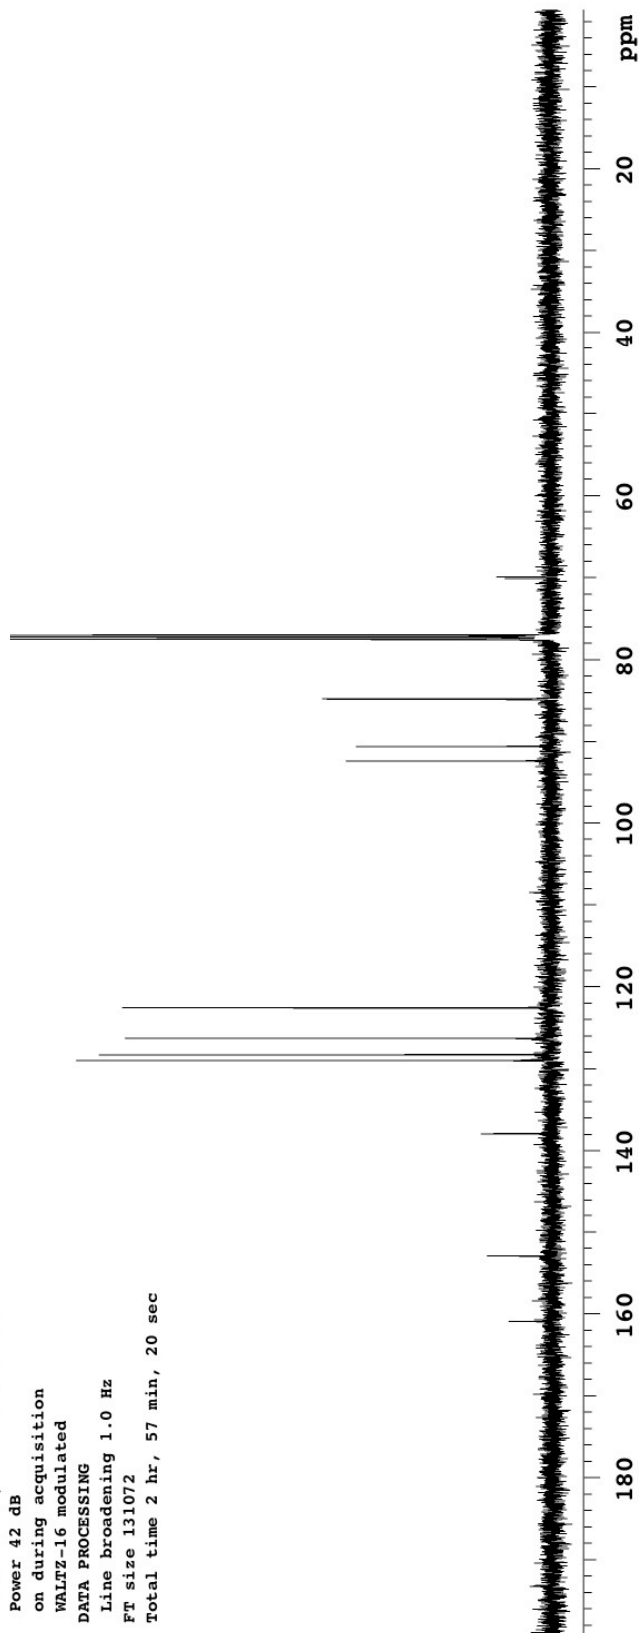

1222-MK-06-424-pure

Archive directory: /export/home/mkl/vmrssys/data  
Sample directory: auto\_13Dec2004

Pulse Sequence: s2pul

Solvent: cdcl3

Temp. 25.0 C / 298.1 K

Operator: barbara

File: 1222-MK-06-424-pure

INOVA-500 "ziga"

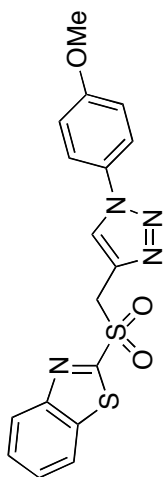

**3**  
500 MHz, CDCl<sub>3</sub>

Relax. delay 1.000 sec  
Pulse 45.0 degrees  
Acq. time 1.892 sec  
Width 7544.3 Hz  
16 repetitions  
OBSERVE H1, 499.7707198 MHz  
DATA PROCESSING  
Line broadening 0.1 Hz  
FT size 32768  
Total time 9 min, 40 sec

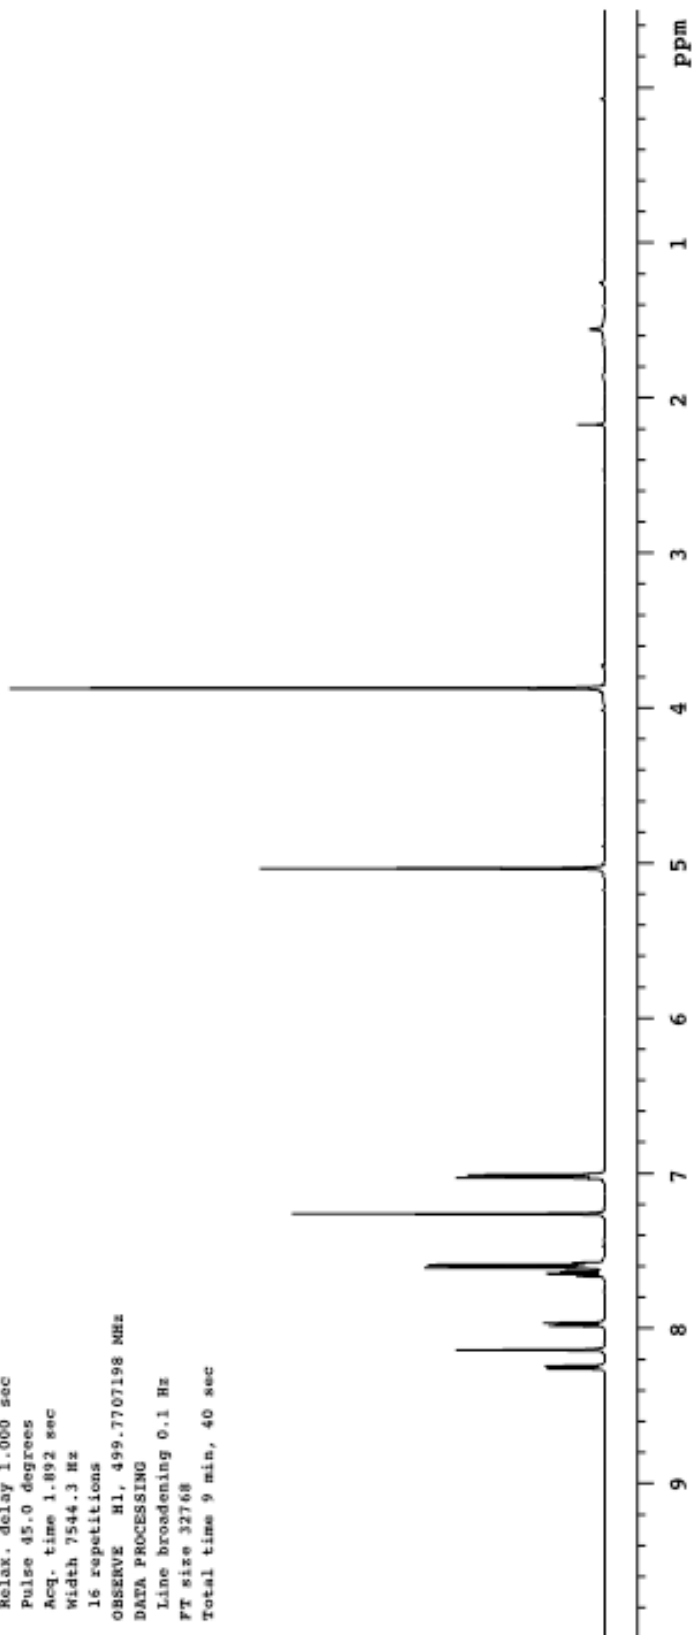

1222-RK-06-424-13C

Archive directory: /export/home/barbara/vnarsys/data  
Sample directory:

Pulse Sequence: s2pul

Solvent: CDCl3

Temp. 25.0 C / 298.1 K

Operator: barbara

File: 1222-RK-06-424-13C

INOVA-500 "ziga"

Relax. delay 4.000 sec

Pulse 52.1 degrees

Acq. time 1.300 sec

Width 29996.3 Hz

1768 repetitions

OBSERVE C13, 125.6674182 MHz

DECOUPLE H1, 499.7732084 MHz

Power 42 dB

on during acquisition

WALTZ-16 modulated

DATA PROCESSING

Line broadening 2.0 Hz

FT size 131072

Total time 2 hr, 57 min, 20 sec

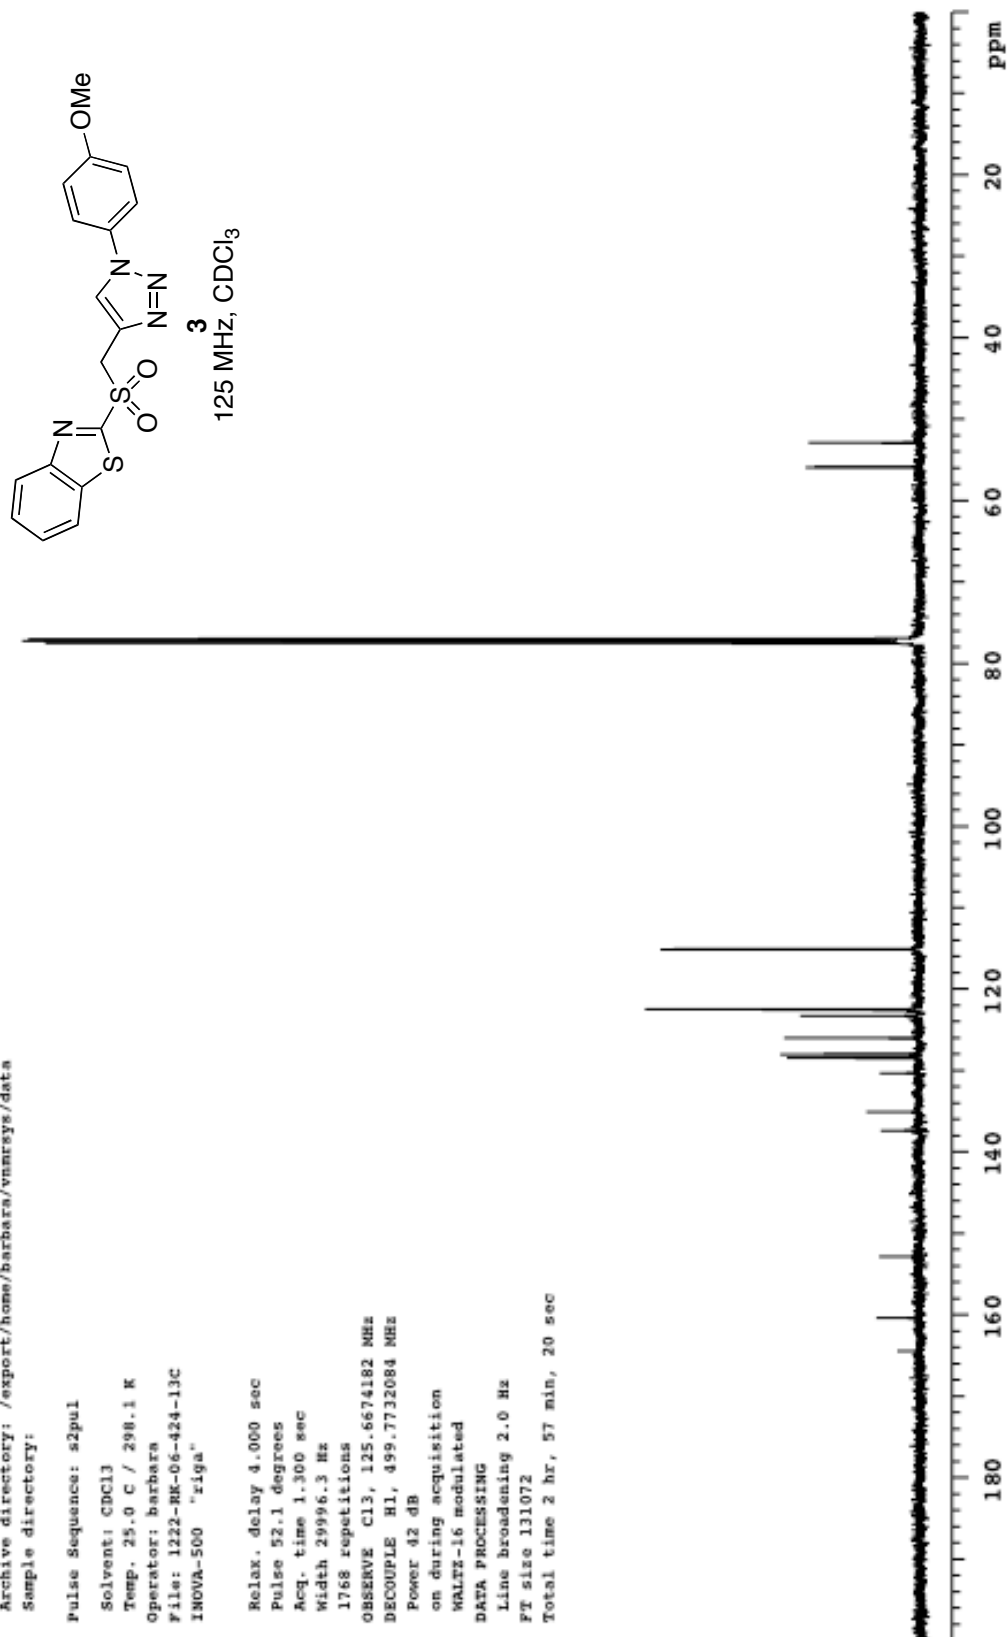

1222-RK-04-246-pure-1H

Archive directory: /export/home/mkl/vnmrsys/data  
Sample directory: auto\_13Dec2004

Pulse Sequence: s2pul  
Solvent: cdcl3  
Temp. 25.0 C / 298.1 K  
Operator: barbara  
File: 1222-RK-04-246-pure-1H  
INOVA-500 "riga"

Relax. delay 1.000 sec  
Pulse 45.0 degrees  
Acq. time 1.892 sec  
Width 7544.3 Hz  
52 repetitions  
OBSERVE H1, 499.7707216 MHz  
DATA PROCESSING  
Line broadening 0.5 Hz  
FT size 32768  
Total time 9 min, 40 sec

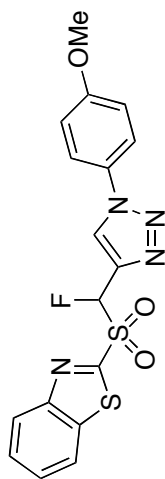

4

500 MHz, CDCl<sub>3</sub>

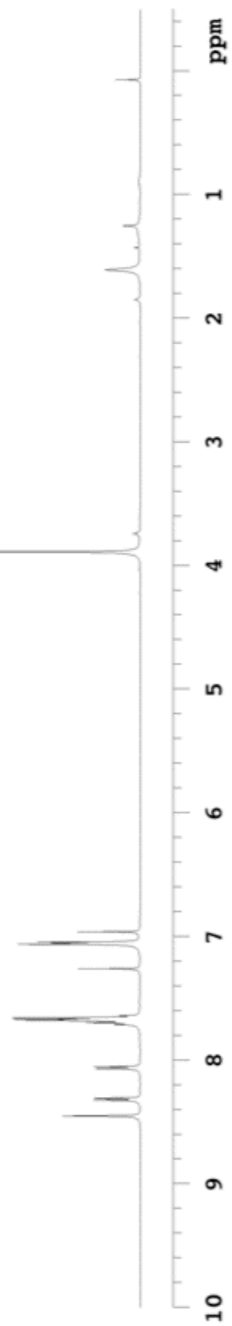

1222-RK-04-246-pure

Archive directory: /export/home/barbara/vnarsys/data  
Sample directory: 1222-RK-04-246-pure\_24Mar2008

Pulse Sequence: s2pul

Solvent: CDCl3  
Temp. 25.0 C / 298.1 K  
Operator: barbara  
File: 1222-RK-04-246-pure  
INOVA-500 "ziga"

Relax. delay 25.000 sec  
Pulse 45.0 degrees  
Acq. time 1.300 sec  
Width 31421.8 Hz  
512 repetitions  
OBSERVE C13, 125.6674148 MHz  
DECOUPLE H1, 499.7732084 MHz  
Power 38 dB  
continuously on  
WALTZ-16 modulated  
DATA PROCESSING  
Line broadening 4.0 Hz  
FT size 131072  
Total time 7 hr, 18 min, 29 sec

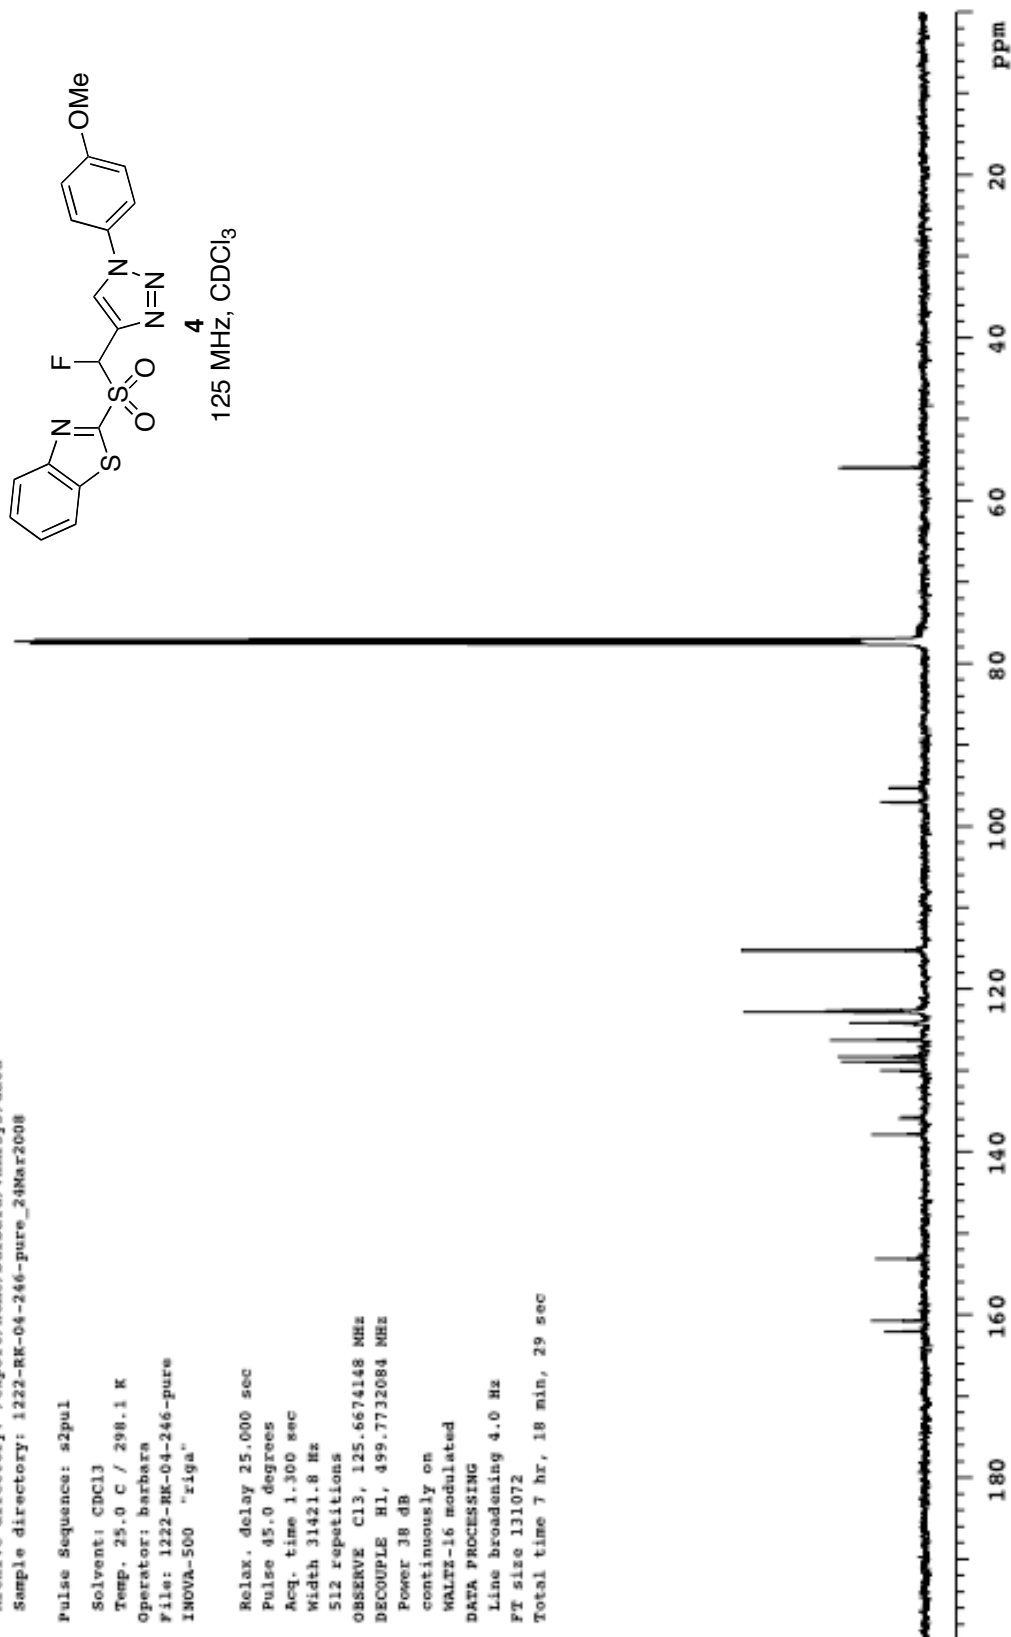

1222-RK-06-423-pure  
Archive directory: /export/home/mkl/vmrssys/data  
Sample directory: auto\_13Dec2004

Pulse Sequence: s2pul

Solvent: cdcl3  
Temp. 25.0 C / 298.1 K  
Operator: barbara  
File: 1222-RK-06-423-pure  
INOVA-500 "ziga"

Relax. delay 1.000 sec  
Pulse 45.0 degrees  
Acq. time 1.892 sec  
Width 7544.3 Hz  
20 repetitions  
OBSERVE H1, 499.7707184 MHz  
DATA PROCESSING  
Line broadening 0.1 Hz  
FT size 32768  
Total time 3 min, 5 sec

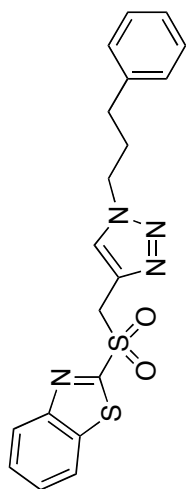

**5**

500 MHz, CDCl<sub>3</sub>

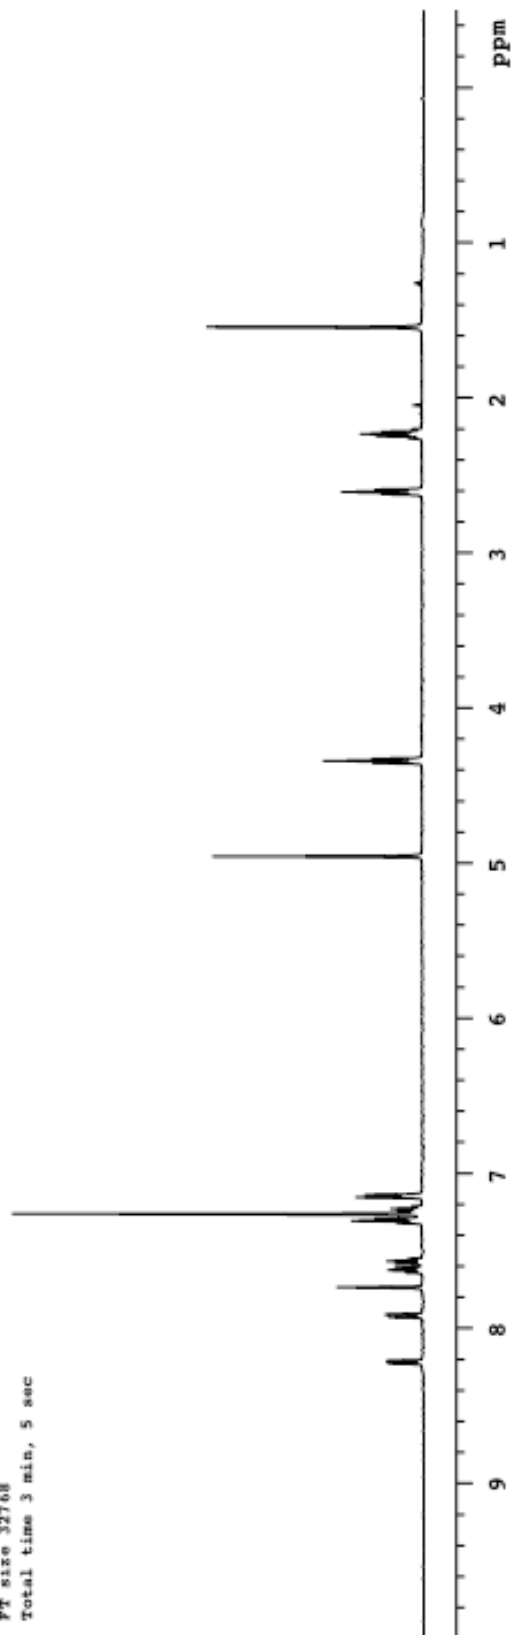



1222-RK-06-423-pure-13C

Archive directory: /export/home/barbara/vnarsys/data  
Sample directory:

Pulse Sequence: s2pul

Solvent: CDCl3

Temp. 25.0 C / 298.1 K

Operator: barbara

File: 1222-RK-06-423-pure-13C

INOVA-500 "ziga"

Relax. delay 4.000 sec

Pulse 52.1 degrees

Acq. time 1.300 sec

Width 29996.3 Hz

284 repetitions

OBSERVE C13, 125.6674264 MHz

DECOUPLE H1, 499.7732084 MHz

Power 42 dB

on during acquisition

WALTZ-16 modulated

DATA PROCESSING

Line broadening 0.1 Hz

FT size 131072

Total time 29 hr, 30 min, 9 sec

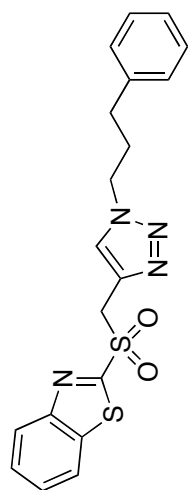

5

125 MHz, CDCl<sub>3</sub>

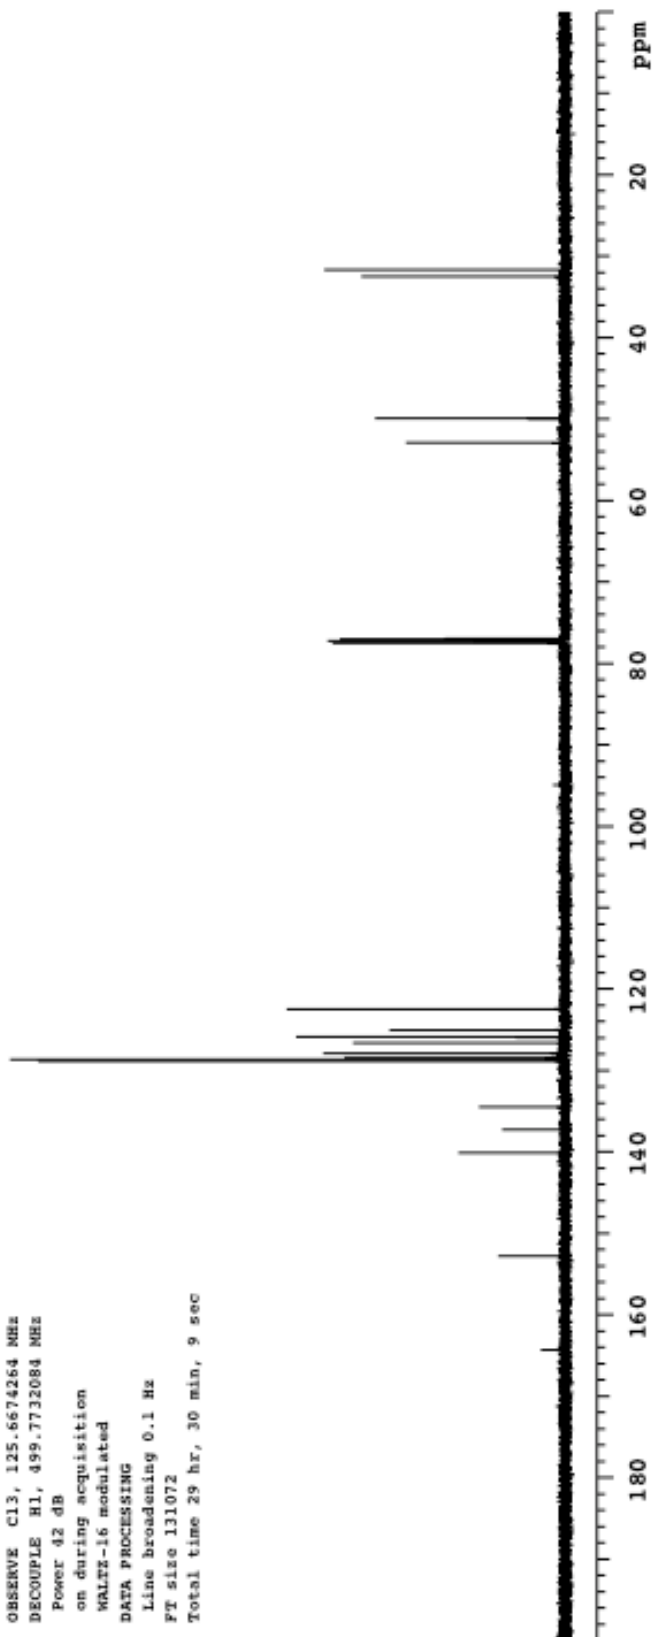

1222-RK-04-258-pure

Archive directory: /export/home/mkl/vmrssys/data  
Sample directory: auto\_13Dec2004

Pulse Sequence: s2pul

Solvent: cdcl3

Temp. 25.0 C / 298.1 K

Operator: barbara

File: 1222-RK-04-258-pure

INOVA-500 "ziga"

Relax. delay 1.000 sec

Pulse 45.0 degrees

Acq. time 1.892 sec

Width 7544.3 Hz

32 repetitions

OBSERVE H1, 499.7707212 MHz

DATA PROCESSING

Line broadening 0.1 Hz

FT size 32768

Total time 1 min, 32 sec

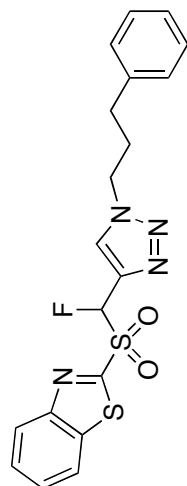

**6**

500 MHz, CDCl<sub>3</sub>

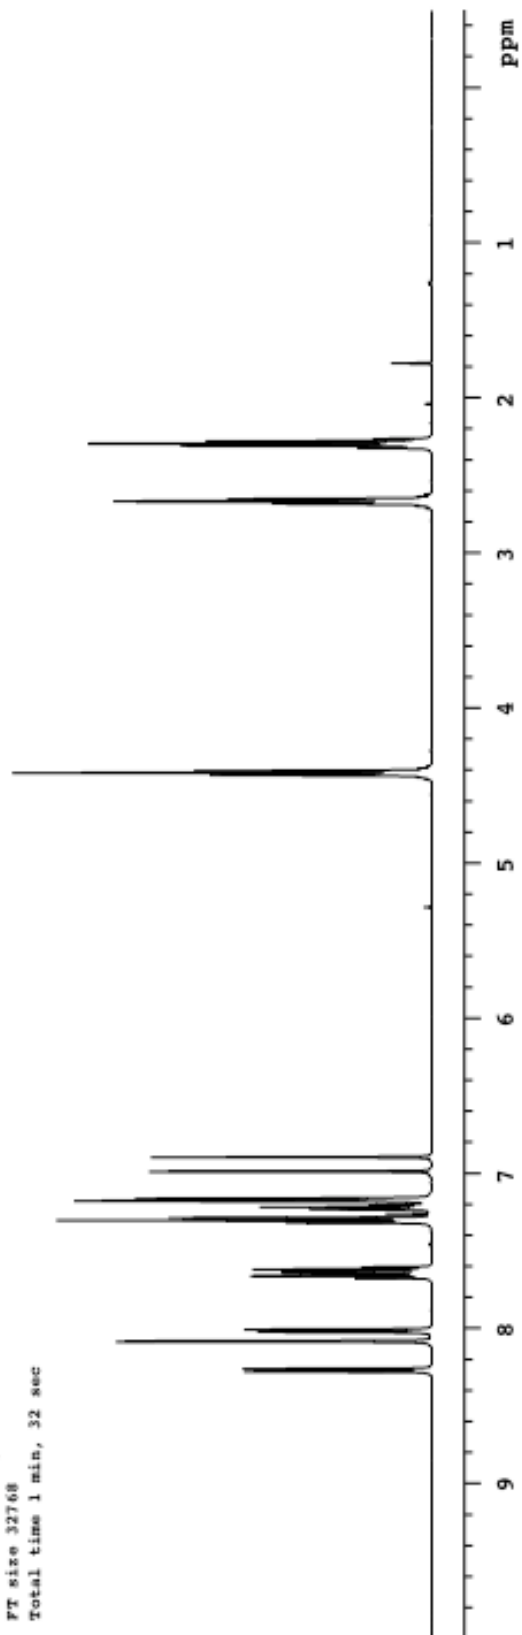

1222-RK-04-258-pure-13C

Pulse Sequence: s2pul

Solvent: CDCl3

Temp. 25.0 C / 298.1 K

Operator: Barbara

File: 1222-RK-04-258-pure-13C

INOVA-500 "riga"

Relax. delay 4.000 sec

Pulse 52.1 degrees

Acq. time 1.300 sec

Width 29996.3 Hz

52 repetitions

OBSERVE C13, 125.6674273 MHz

DECOUPLE H1, 499.7732084 MHz

Power 42 dB

on during acquisition

WALTZ-16 modulated

DATA PROCESSING

Line broadening 2.0 Hz

FT size 131072

Total time 2 hr, 57 min, 20 sec

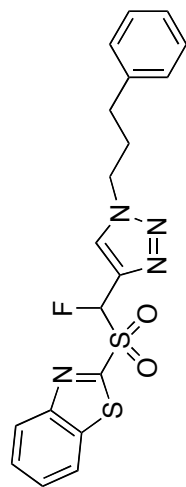

**6**  
125 MHz, CDCl<sub>3</sub>

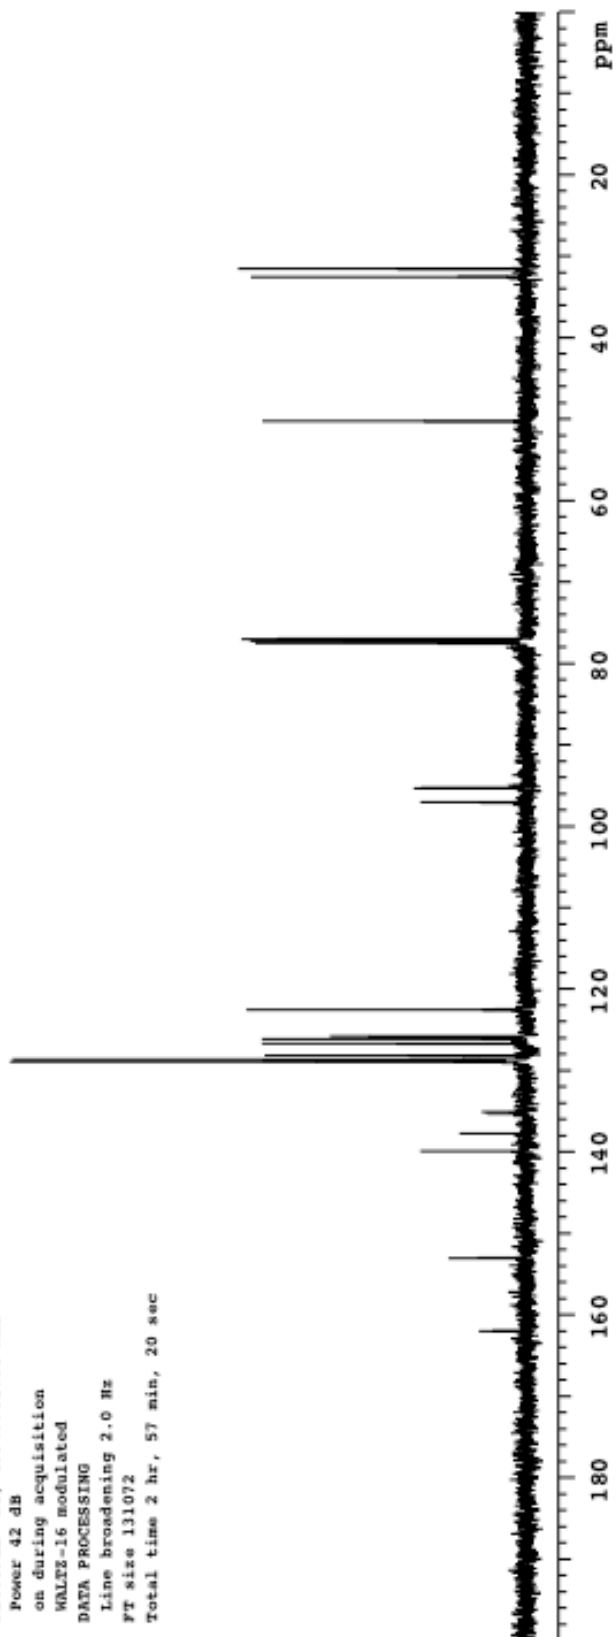

1222-RK-09-679

Archive directory: /export/home/mkl/vmrssys/data  
Sample directory: auto\_13Dec2004

Pulse Sequence: s2pul

Solvent: cdcl3

Temp. 25.0 C / 298.1 K

Operator: barbara

File: 1222-RK-09-679

INOVA-500 "ziga"

Relax. delay 1.000 sec

Pulse 45.0 degrees

Acq. time 1.892 sec

Width 10000.0 Hz

129 repetitions

OBSERVE H1, 499.7707215 MHz

DATA PROCESSING

Line broadening 1.0 Hz

FT size 65536

Total time 9 min, 40 sec

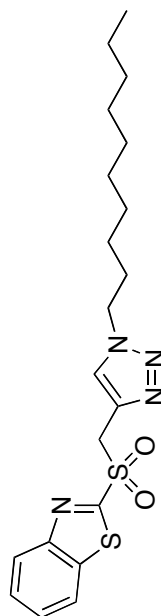

7

500 MHz, CDCl<sub>3</sub>

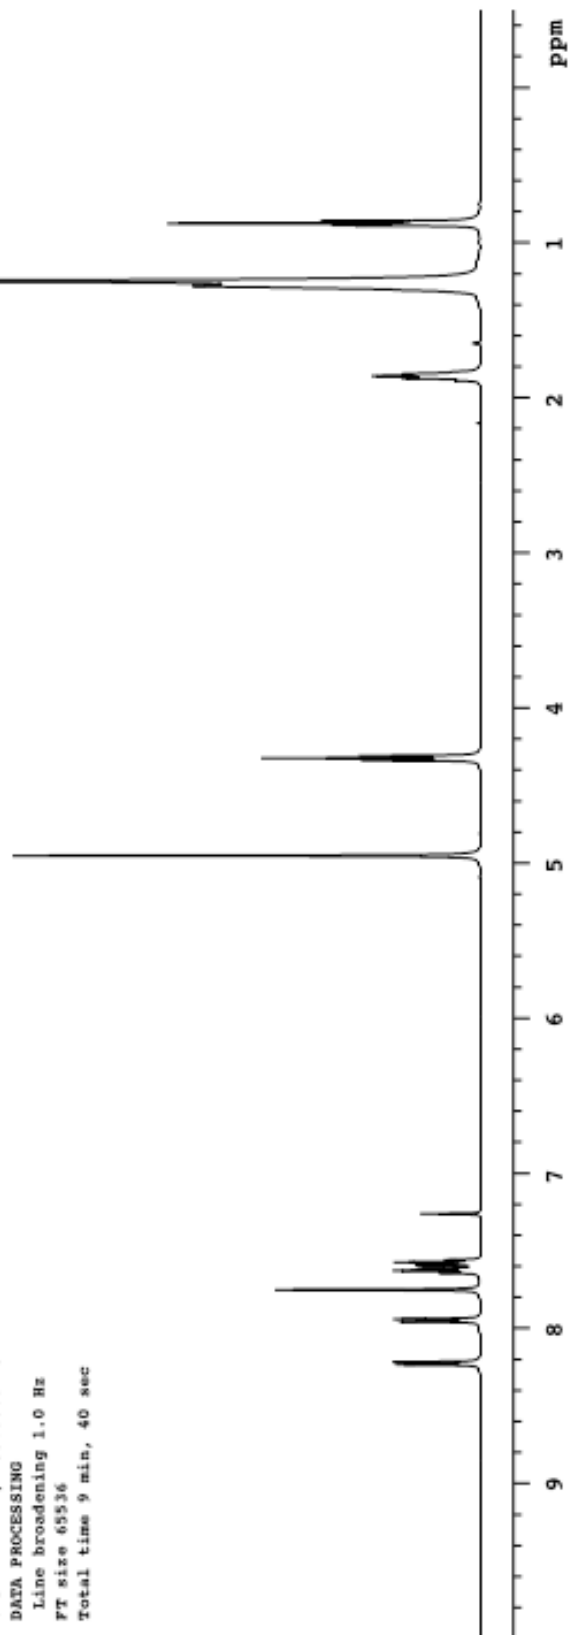

1222-RK-09-679-13C

Pulse Sequence: s2pul

Solvent: CDCl3

Temp. 25.0 C / 298.1 K

Operator: Barbara

File: 1222-RK-09-679-13C

INOVA-500 "riga"

Relax. delay 4.000 sec

Pulse 52.1 degrees

Acq. time 1.300 sec

Width 29996.3 Hz

566 repetitions

OBSERVE C13, 125.6674214 MHz

DECOUPLE H1, 499.7732084 MHz

Power 42 dB

on during acquisition

WALTZ-16 modulated

DATA PROCESSING

Line broadening 3.0 Hz

FT size 131072

Total time 4 hr, 43 min, 31 sec

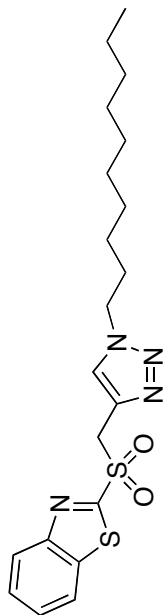

7

125 MHz, CDCl<sub>3</sub>

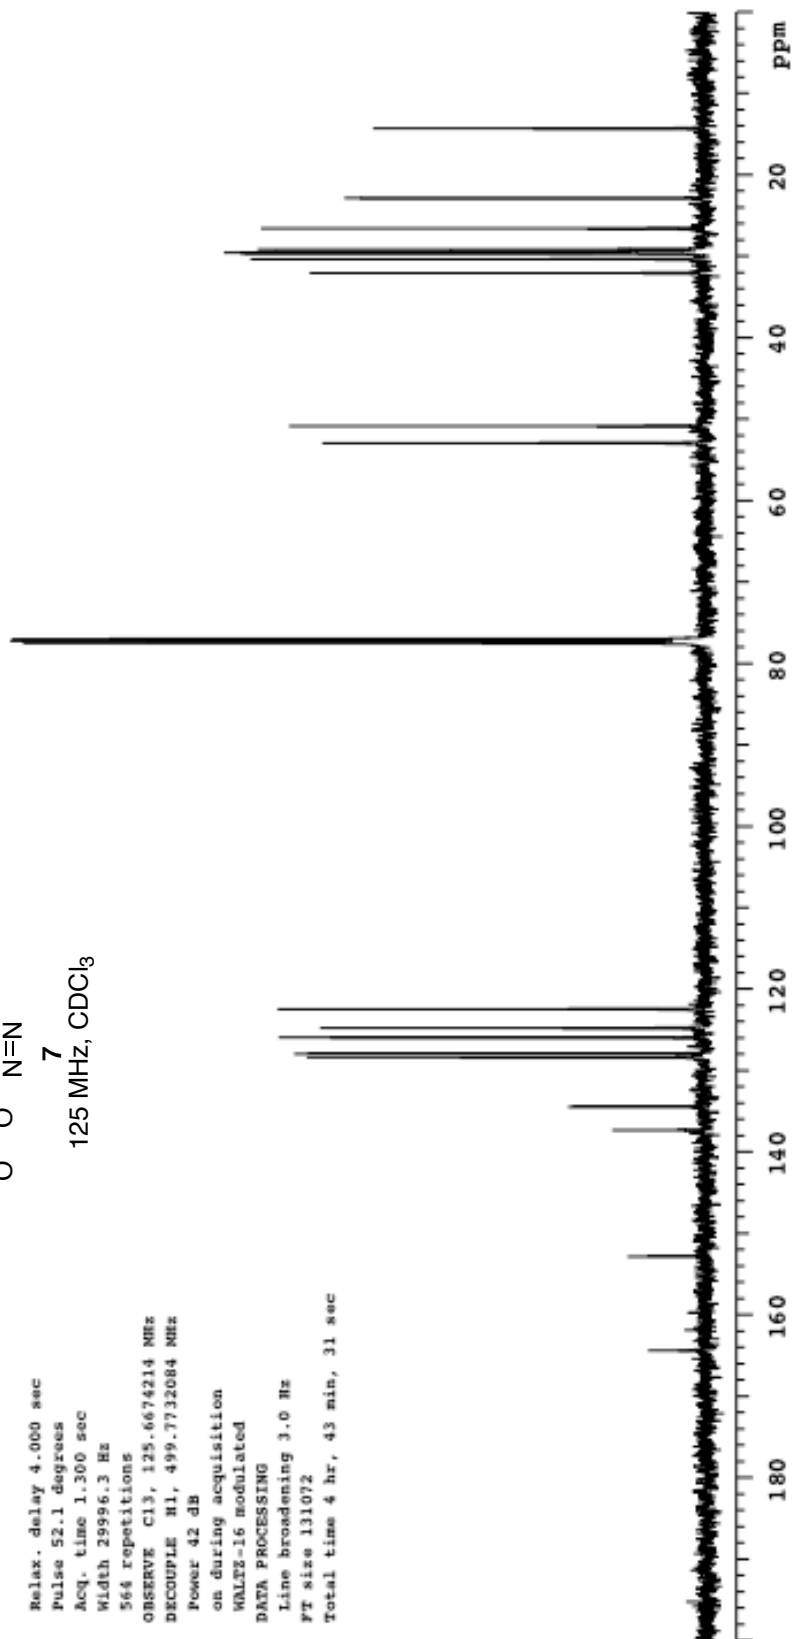

1222-RK-04-270-pure

Archive directory: /export/home/mkl/vmrssys/data  
Sample directory: auto\_13Dec2004

Pulse Sequence: s2pul

Solvent: cdcl3

Temp. 25.0 C / 298.1 K

Operator: barbara

File: 1222-RK-04-270-pure

INNOVA-500 "ziga"

Relax. delay 1.000 sec

Pulse 45.0 degrees

Acq. time 1.892 sec

Width 7544.3 Hz

16 repetitions

OBSERVE H1, 499.7707212 MHz

DATA PROCESSING

Line broadening 0.1 Hz

FT size 32768

Total time 1 min, 32 sec

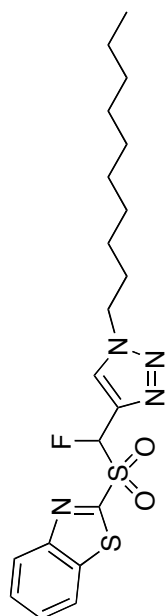

**8**  
500 MHz, CDCl<sub>3</sub>

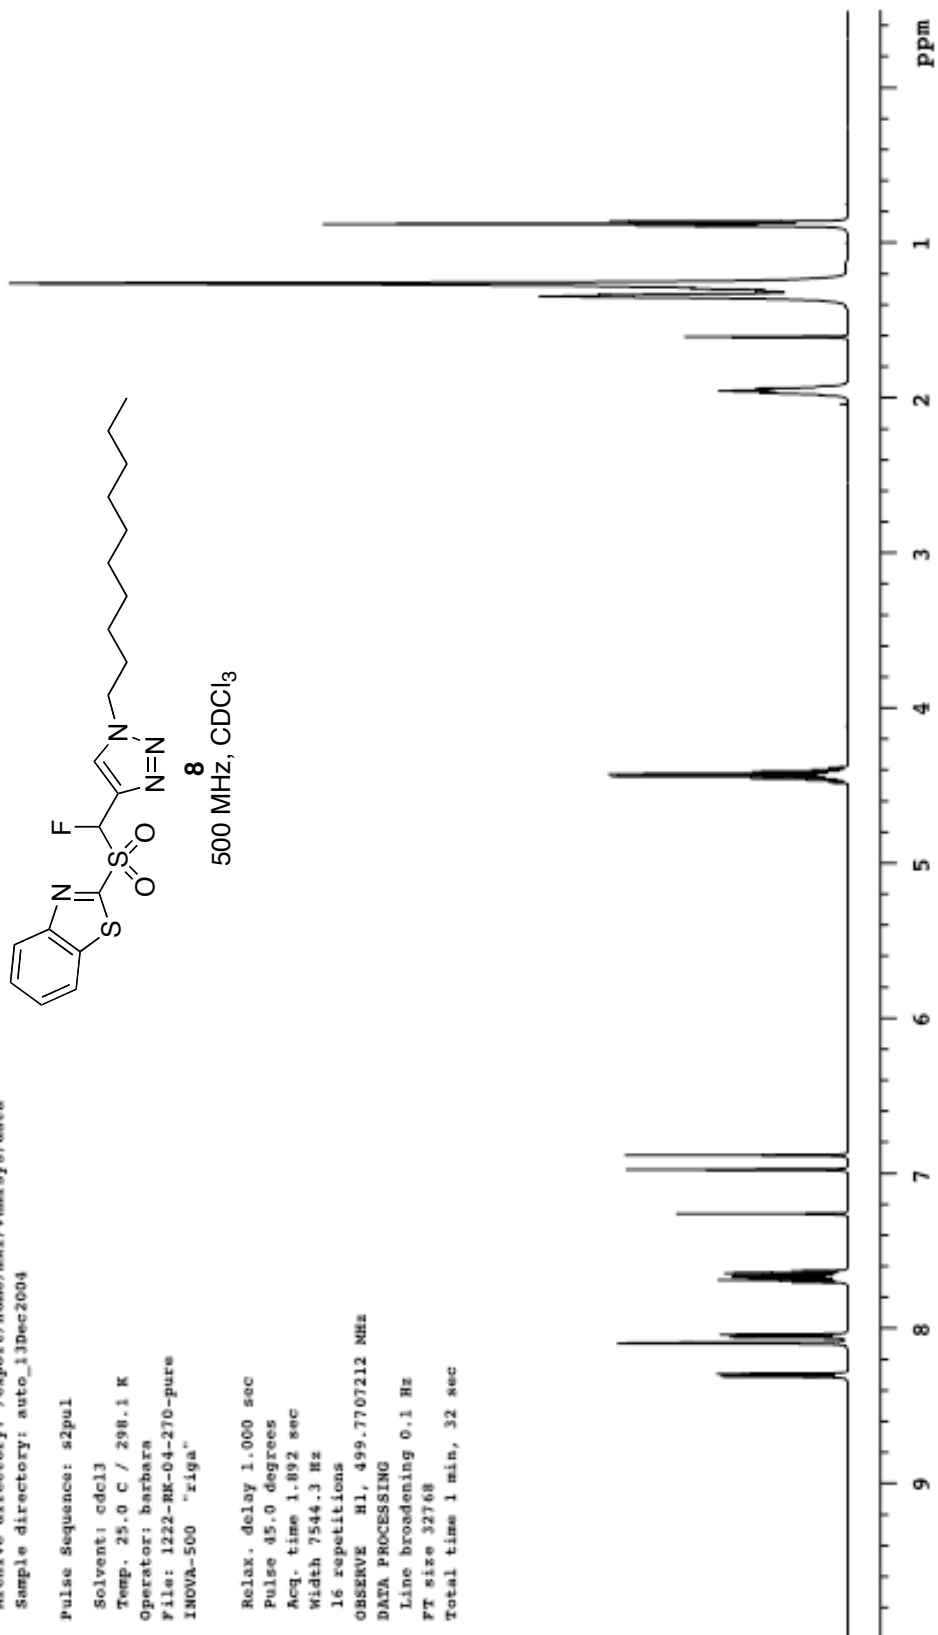

1222-RK-04-270-13C

Pulse Sequence: s2pul

Solvent: CDCl3

Temp. 25.0 C / 298.1 K

Operator: Barbara

File: 1222-RK-04-270-13C

INOVA-500 "riga"

Relax. delay 4.000 sec

Pulse 52.1 degrees

Acq. time 1.300 sec

Width 29996.3 Hz

64 repetitions

OBSERVE C13, 125.6674571 MHz

DECOUPLE H1, 499.7732084 MHz

Power 42 dB

on during acquisition

WALTZ-16 modulated

DATA PROCESSING

Line broadening 3.0 Hz

FT size 131072

Total time 18 min, 3 sec

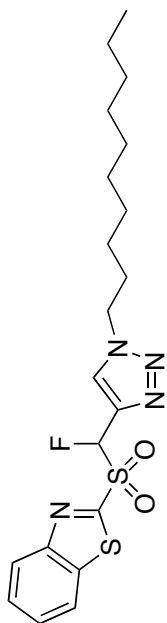

**8**

125 MHz, CDCl<sub>3</sub>

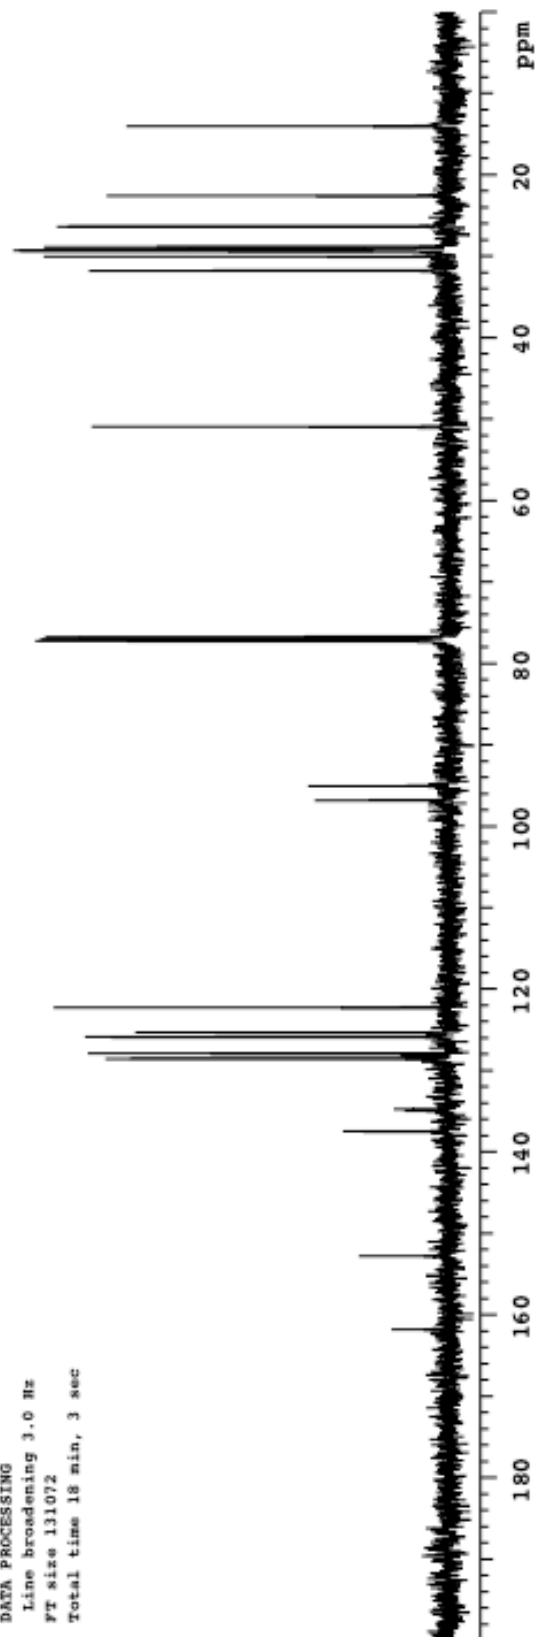

1222-RK-06-480-benzene-d6  
Archive directory: /export/home/mkl/vnmrsys/data  
Sample directory: auto\_13Dec2004  
Pulse Sequence: s2pul  
Solvent: benzene  
Temp. 25.0 C / 298.1 K  
Operator: barbara  
File: 1222-RK-06-480-benzene-d6  
INOVA-500 "ziga"  
  
Relax. delay 1.000 sec  
Pulse 45.0 degrees  
Acq. time 1.892 sec  
Width 7544.3 Hz  
16 repetitions  
OBSERVE H1, 499.7707545 MHz  
DATA PROCESSING  
Line broadening 0.5 Hz  
FT size 32768  
Total time 9 min, 40 sec

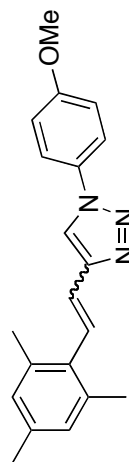

(E/Z)-9  
500 MHz, C<sub>6</sub>D<sub>6</sub>

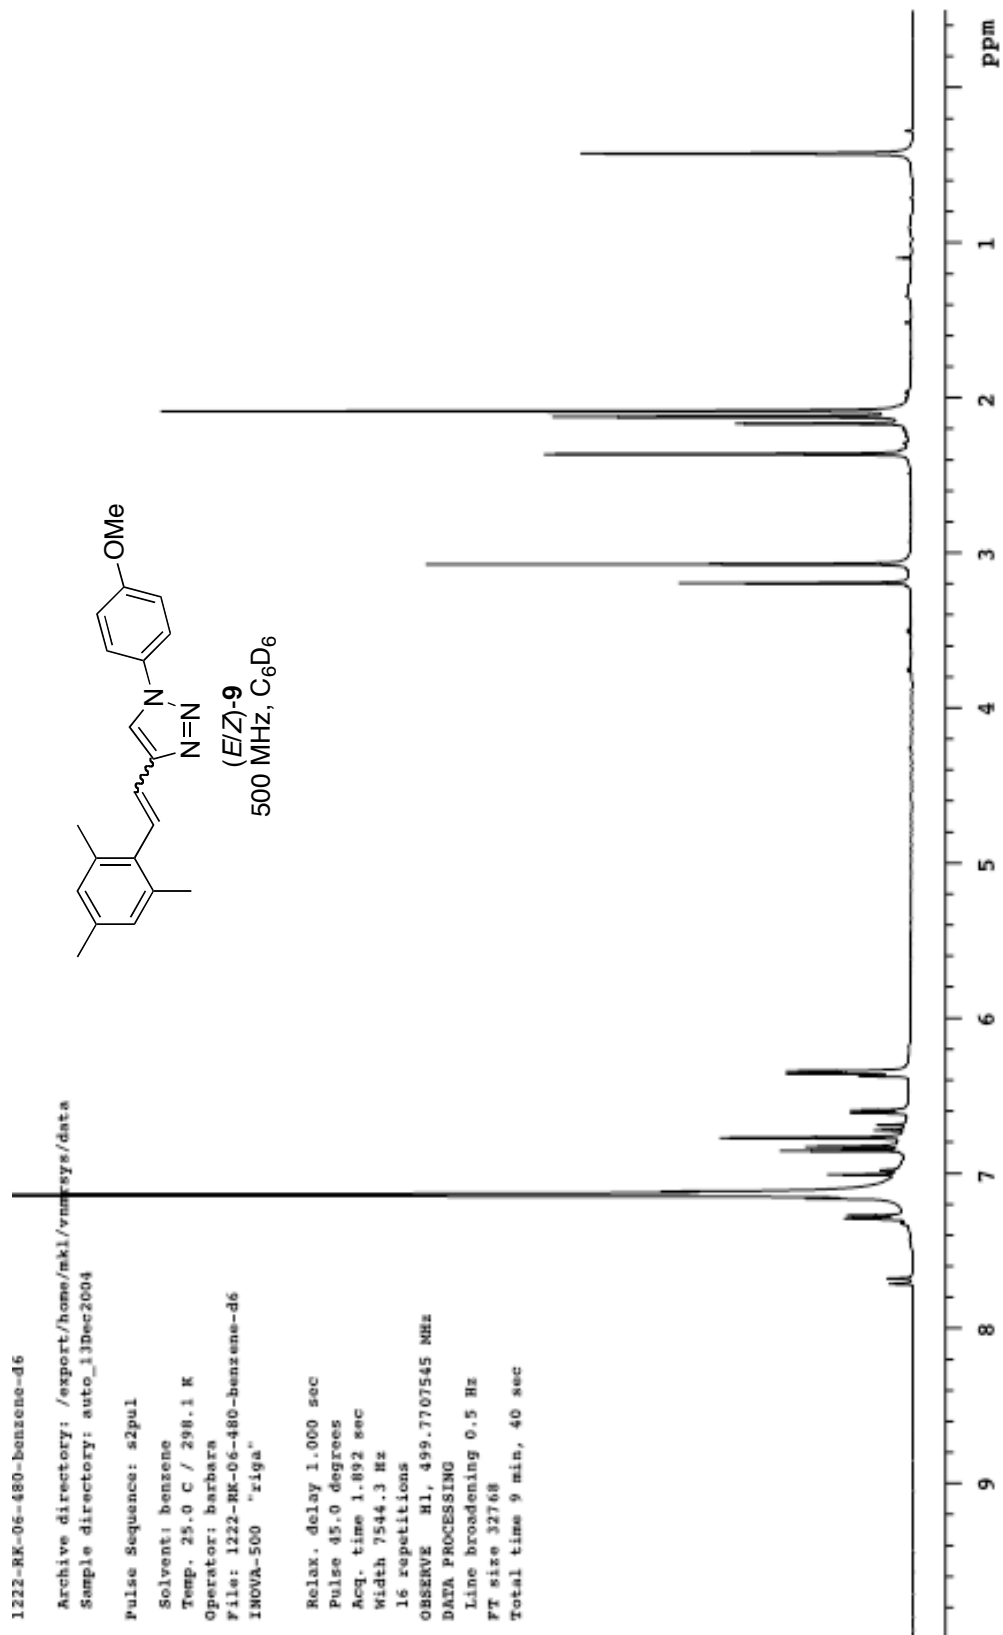



1222-MK-06-463-pure-acetone-D6

Archive directory: /export/home/mkl/vmrsvs/data

Sample directory: auto\_13Dec2004

Pulse Sequence: s2pul

Solvent: acetone

Temp. 25.0 C / 298.1 K

Operator: barbara

File: 1222-MK-06-463-pure-acetone-D6

INOVA-500 "riga"

Relax. delay 1.000 sec

Pulse 45.0 degrees

Acq. time 1.892 sec

Width 7544.3 Hz

32 repetitions

OBSERVE H1, 499.7733168 MHz

DATA PROCESSING

Line broadening 0.1 Hz

FT size 32768

Total time 9 min, 40 sec

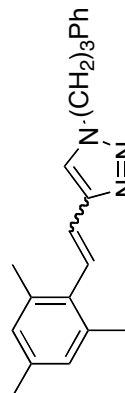

(E/Z)-10

500 MHz, acetone-d<sub>6</sub>

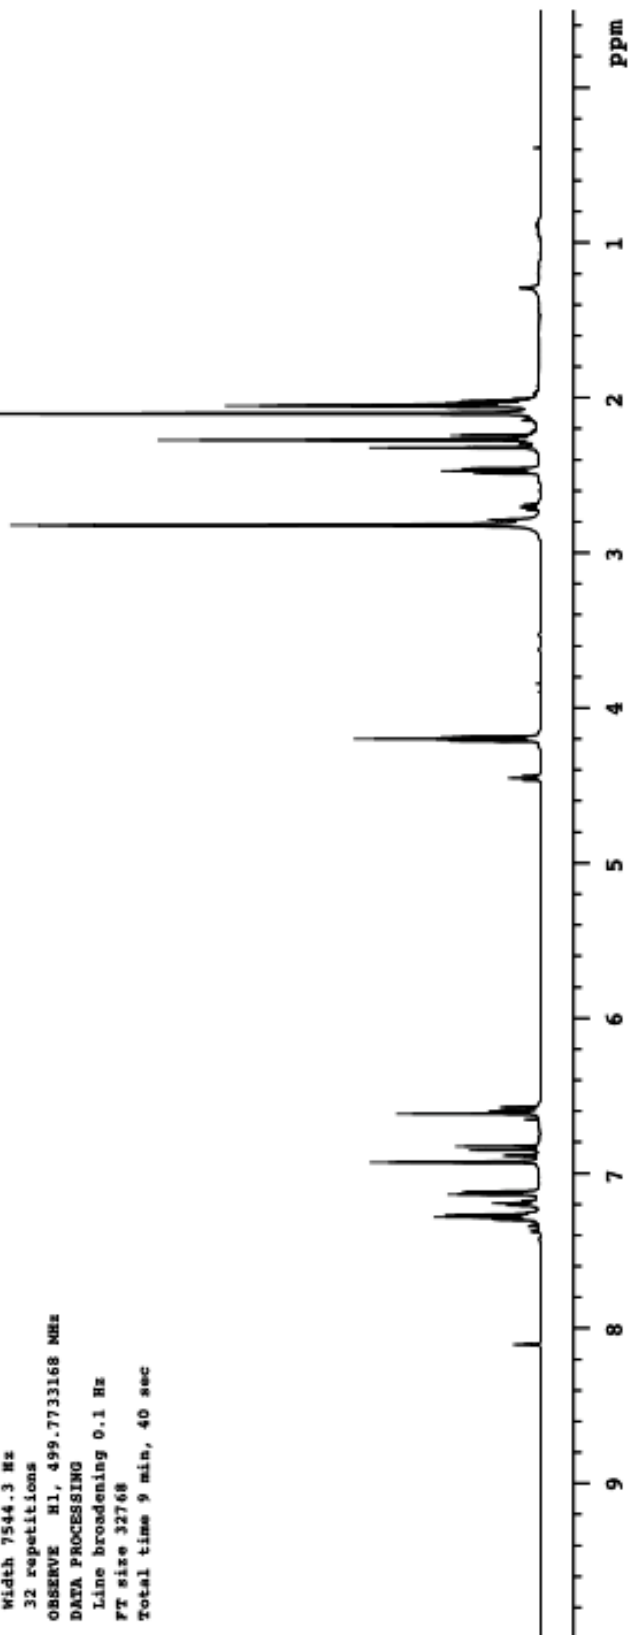



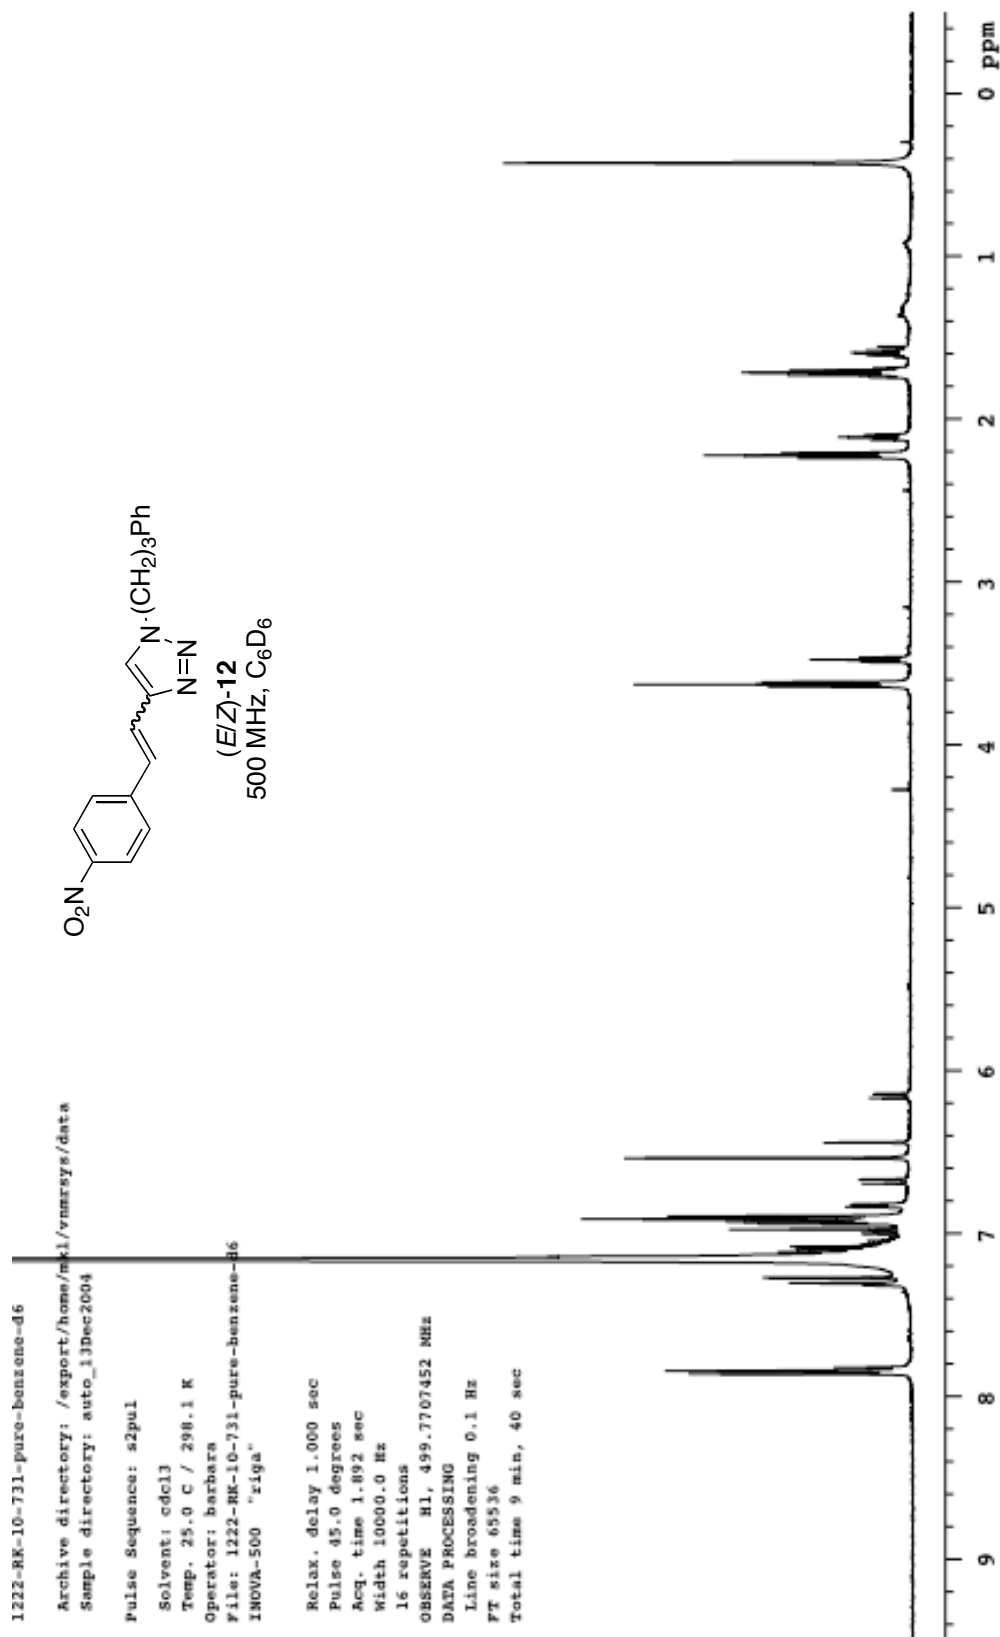

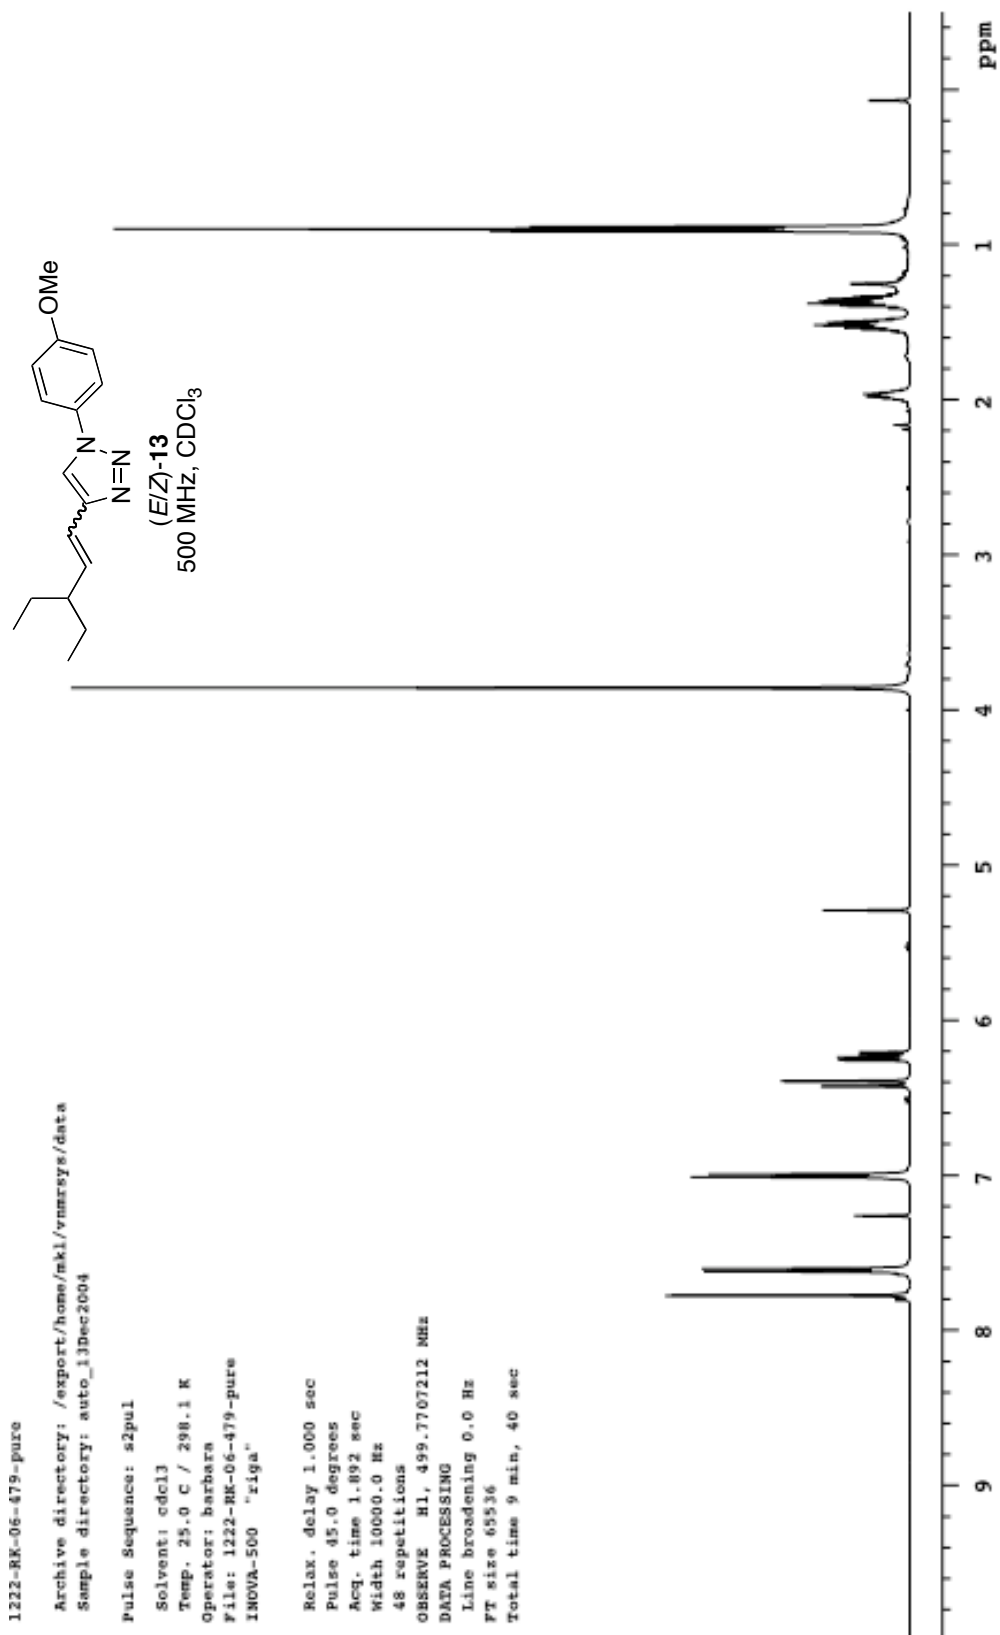

1222-RK-06-433-1stfraction

Archive directory: /export/home/mkl/vmrssys/data

Sample directory: auto\_13Dec2004

Pulse Sequence: s2pul

Solvent: cdcl3

Temp. 25.0 C / 298.1 K

Operator: barbara

File: 1222-RK-06-433-1stfraction

INOVA-500 "ziga"

Relax. delay 1.000 sec

Pulse 45.0 degrees

Acq. time 1.892 sec

Width 7544.3 Hz

16 repetitions

OBSERVE H1, 499.7707226 MHz

DATA PROCESSING

Line broadening 0.1 Hz

FT size 32768

Total time 9 min, 40 sec

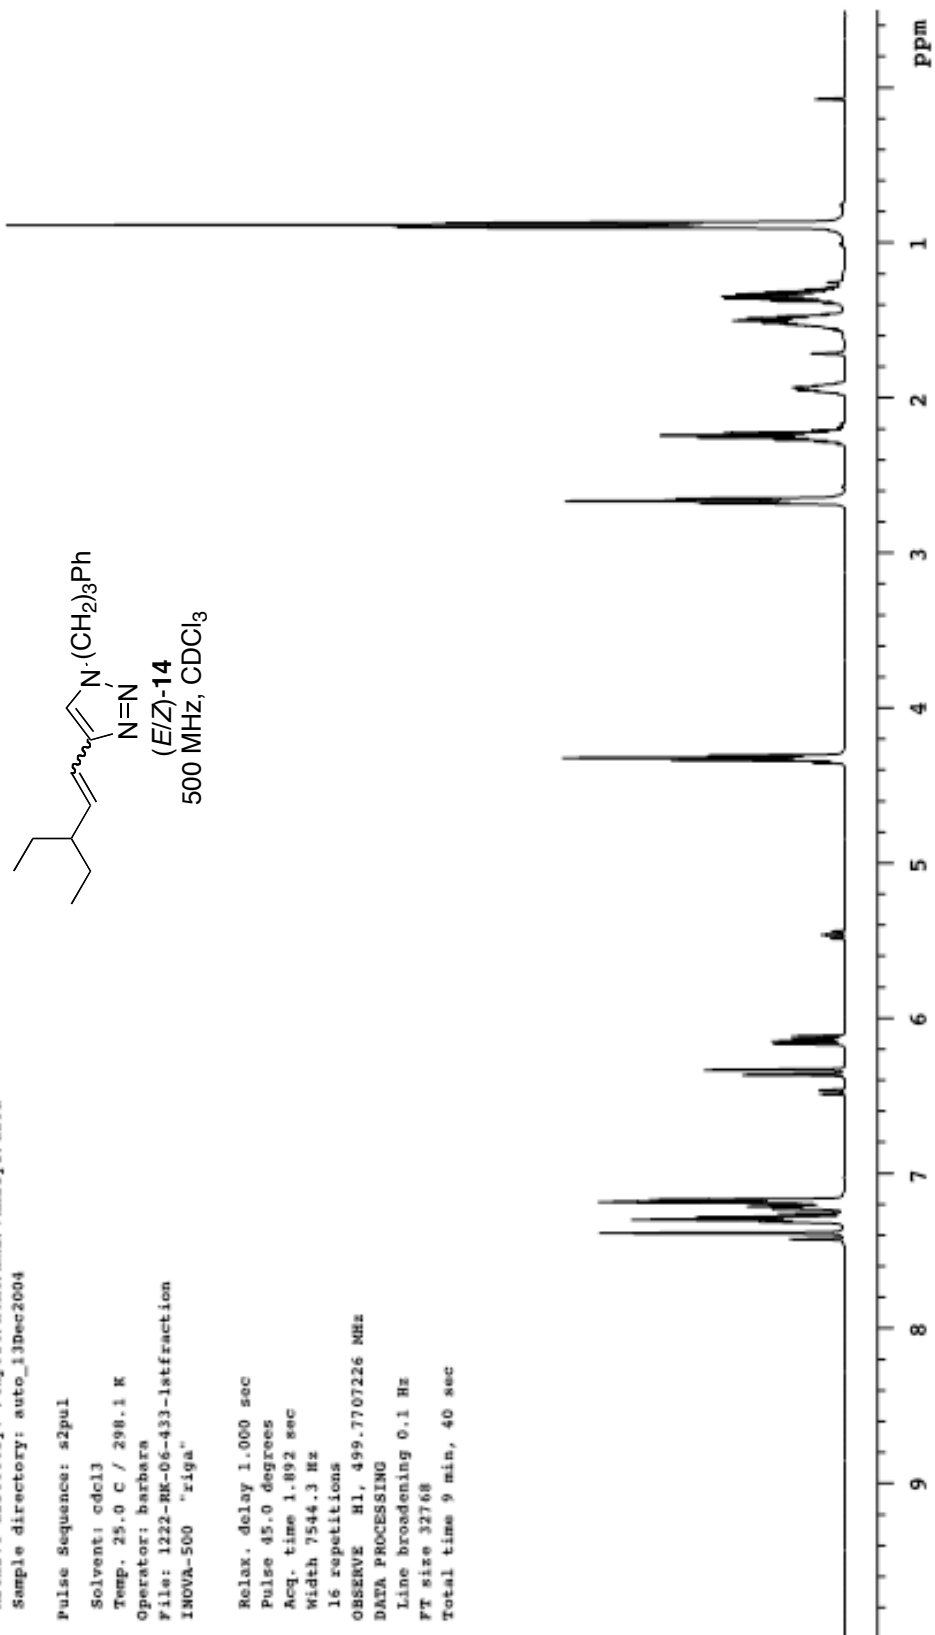

1222-Rk-06-481

Archive directory: /export/home/mkl/vmrssys/data  
Sample directory: auto\_13Dec2004

Pulse Sequence: s2pul

Solvent: cdcl3

Temp. 10.0 C / 283.1 K

Operator: barbara

File: 1222-Rk-06-481

INOVA-500 "ziga"

Relax. delay 1.000 sec

Pulse 45.0 degrees

Acq. time 1.892 sec

Width 10000.0 Hz

12 repetitions

OBSERVE H1, 499.7707215 MHz

DATA PROCESSING

Line broadening 0.5 Hz

FT size 65536

Total time 0 min, 58 sec

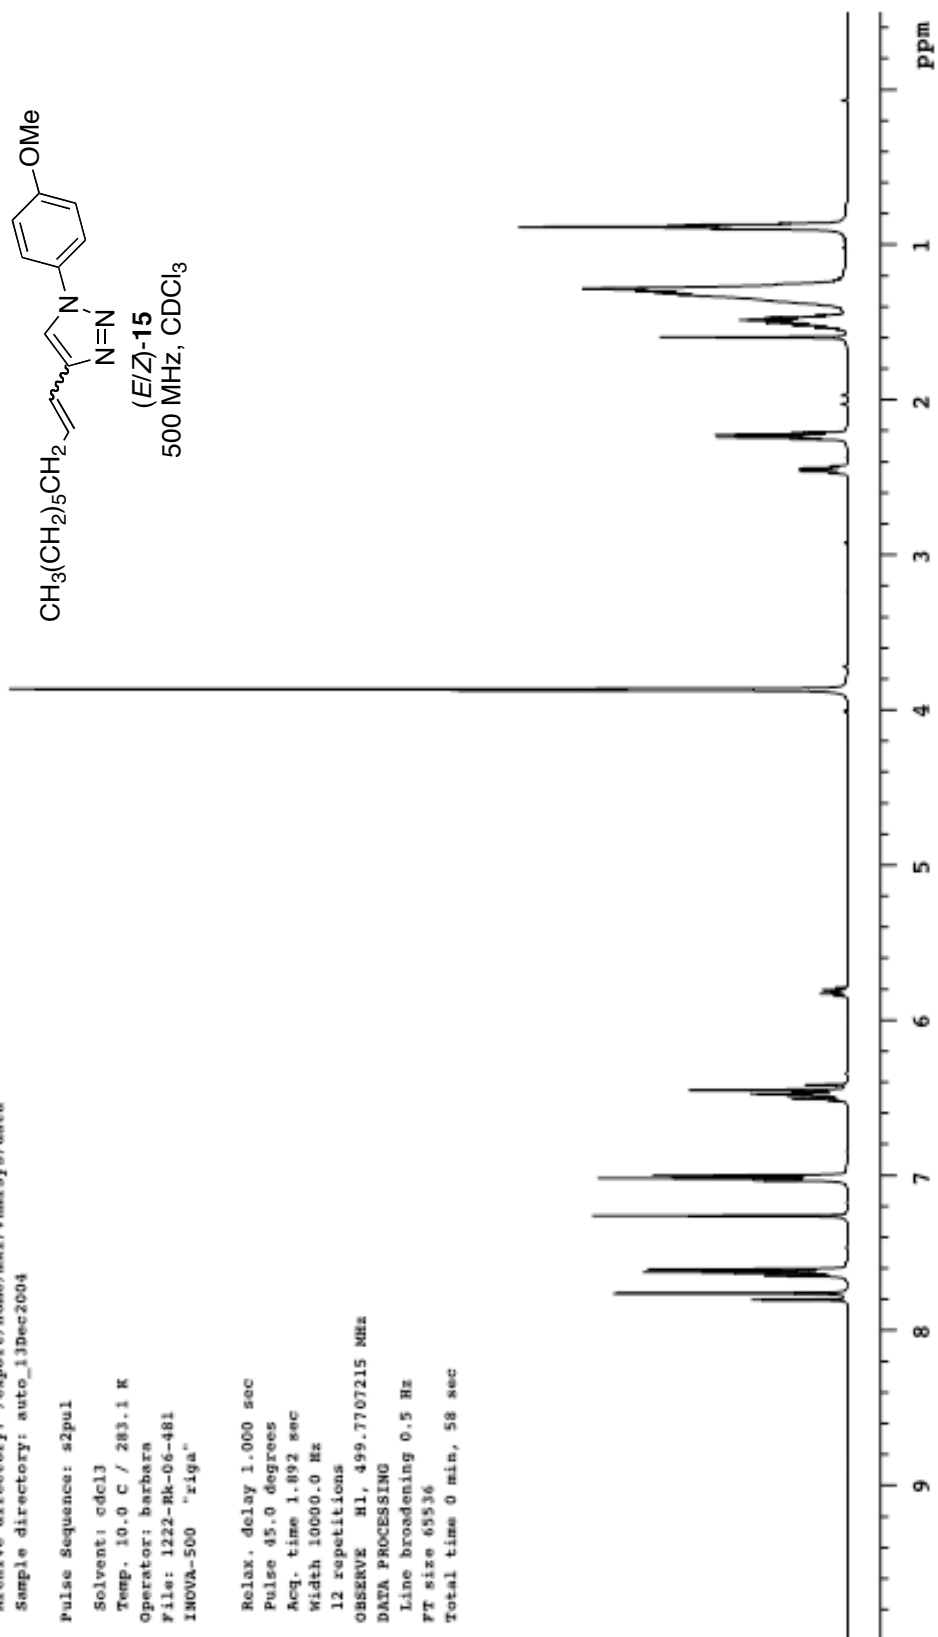



1222-RK-10-734-pure

Archive directory: /export/home/mkl/vmrssys/data  
Sample directory: auto\_13Dec2004

Pulse Sequence: s2pul

Solvent: cdcl3

Temp. 25.0 C / 298.1 K

Operator: barbara

File: 1222-RK-10-734-pure

INOVA-500 "ziga"

Relax. delay 1.000 sec

Pulse 45.0 degrees

Acq. time 1.892 sec

Width 10000.0 Hz

20 repetitions

OBSERVE H1, 499.7707452 MHz

DATA PROCESSING

Line broadening 0.1 Hz

FT size 65536

Total time 9 min, 40 sec

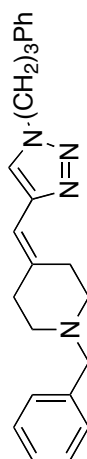

17

500 MHz, CDCl<sub>3</sub>

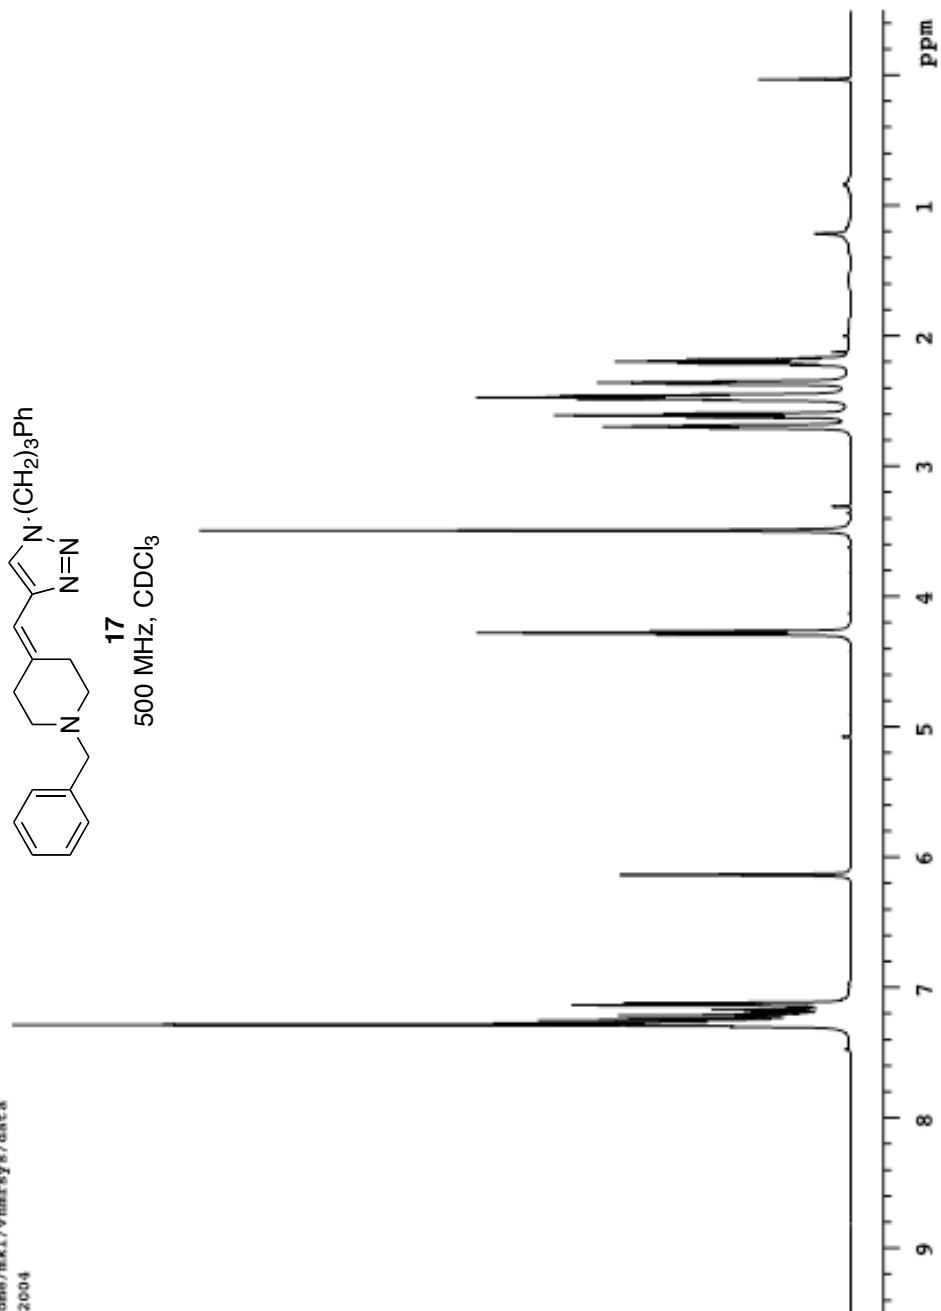



1222-RK-11-851-pure

Pulse Sequence: zgpg30

Solvent: CDCl3

Ambient temperature

Operator: Barbara

File: 1222-RK-11-851-pure

INOVA-500 "riga"

Pulse 48.0 degrees

Acq. time 1.892 sec

Width 8000.0 Hz

44 repetitions

OBSERVE H1, 499.7707217 MHz

DATA PROCESSING

FT size 32768

Total time 6 min, 20 sec

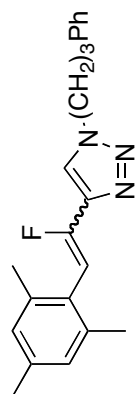

(*E/Z*)-18

500 MHz, CDCl<sub>3</sub>

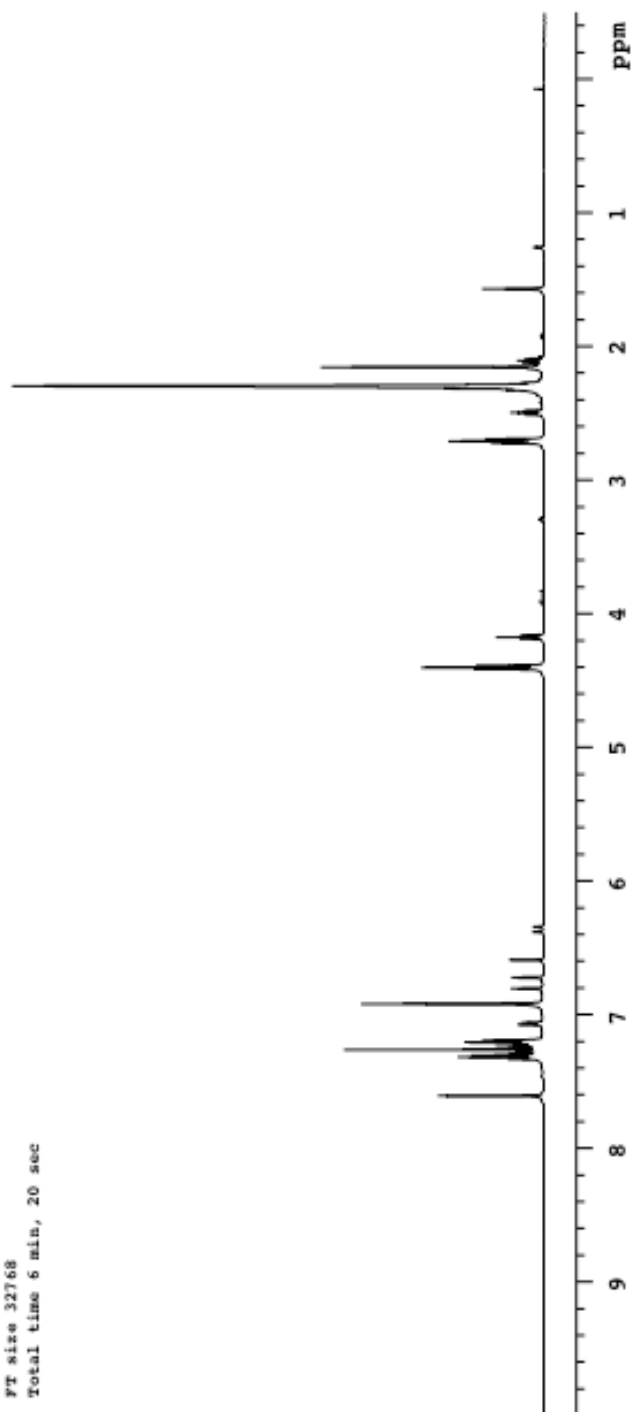

1222-RK-04-306-2ndfraction

Archive directory: /export/home/barbara/vmarsys/data

Sample directory:

Pulse Sequence: s2pul

Solvent: cdcl3

Temp. 25.0 C / 298.1 K

Operator: barbara

File: 1222-RK-04-306-2ndfraction

INOVA-500 "ziga"

Relax. delay 1.000 sec

Pulse 45.0 degrees

Acq. time 1.892 sec

Width 7544.3 Hz

60 repetitions

OBSERVE H1, 499.7707189 MHz

DATA PROCESSING

Line broadening 0.1 Hz

FT size 32768

Total time 9 min, 40 sec

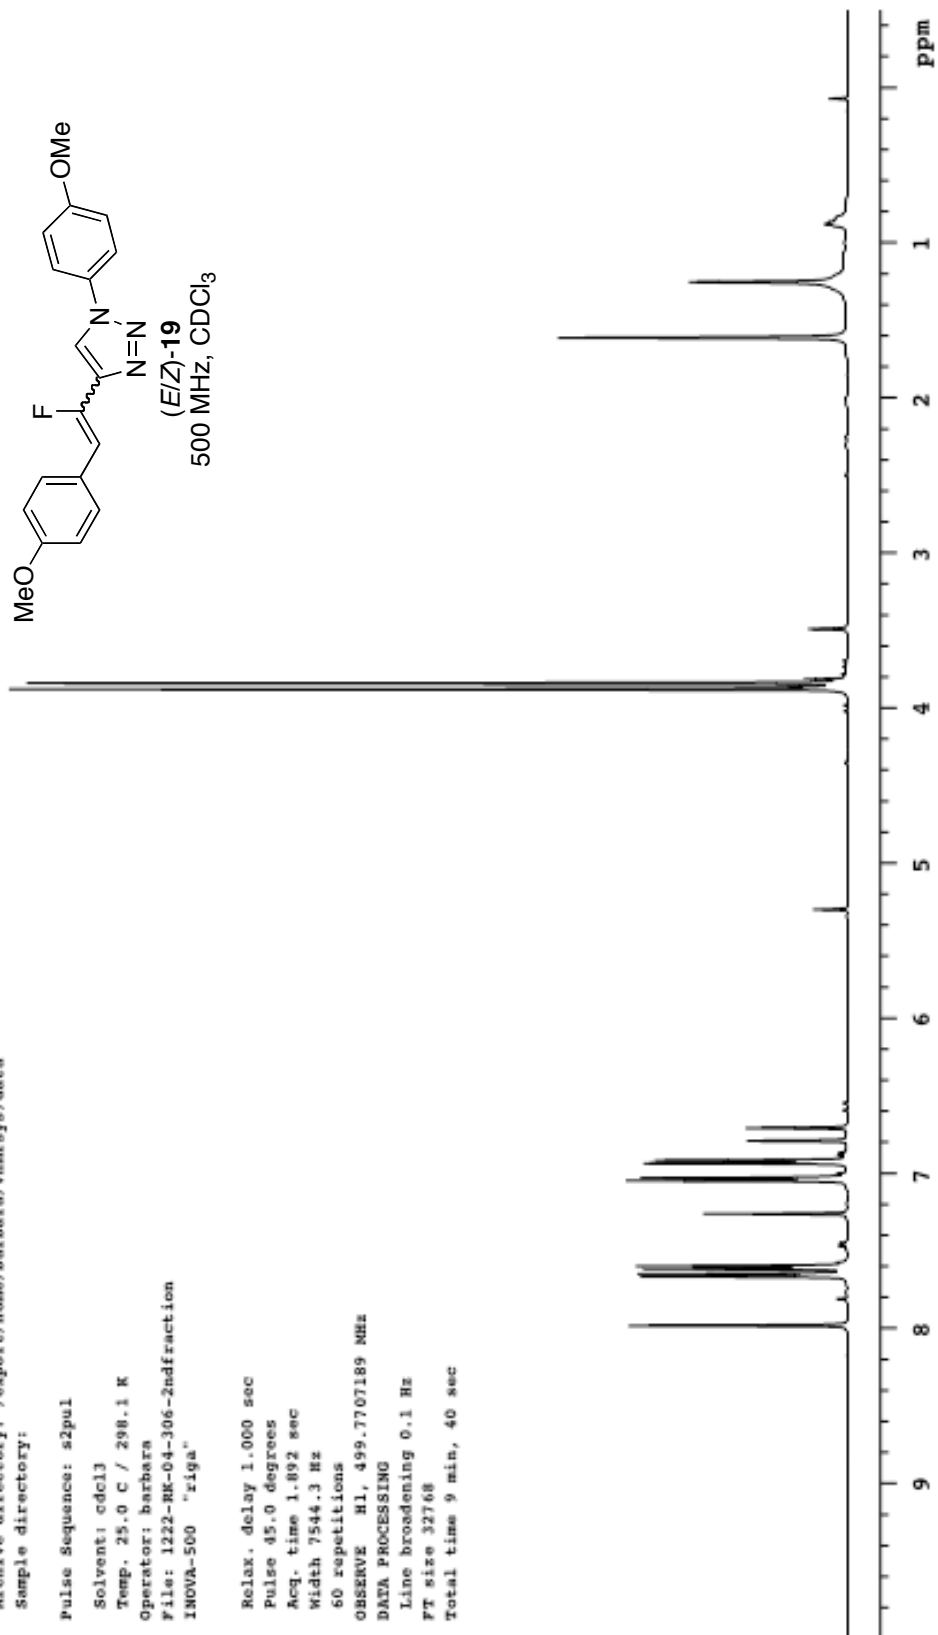

1222-RK-04-308-pure

Archive directory: /export/home/mkl/vmrssys/data  
Sample directory: auto\_13Dec2004

Pulse Sequence: s2pul

Solvent: cdcl3

Temp. 25.0 C / 298.1 K

Operator: barbara

File: 1222-RK-04-308-pure

INOVA-500 "ziga"

Relax. delay 1.000 sec

Pulse 45.0 degrees

Acq. time 1.892 sec

Width 7544.3 Hz

48 repetitions

OBSERVE H1, 499.7707198 MHz

DATA PROCESSING

Line broadening 0.1 Hz

FT size 32768

Total time 9 min, 40 sec

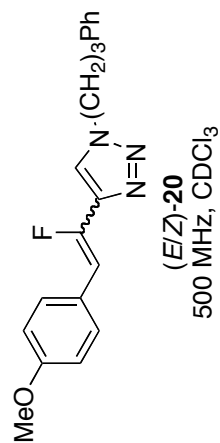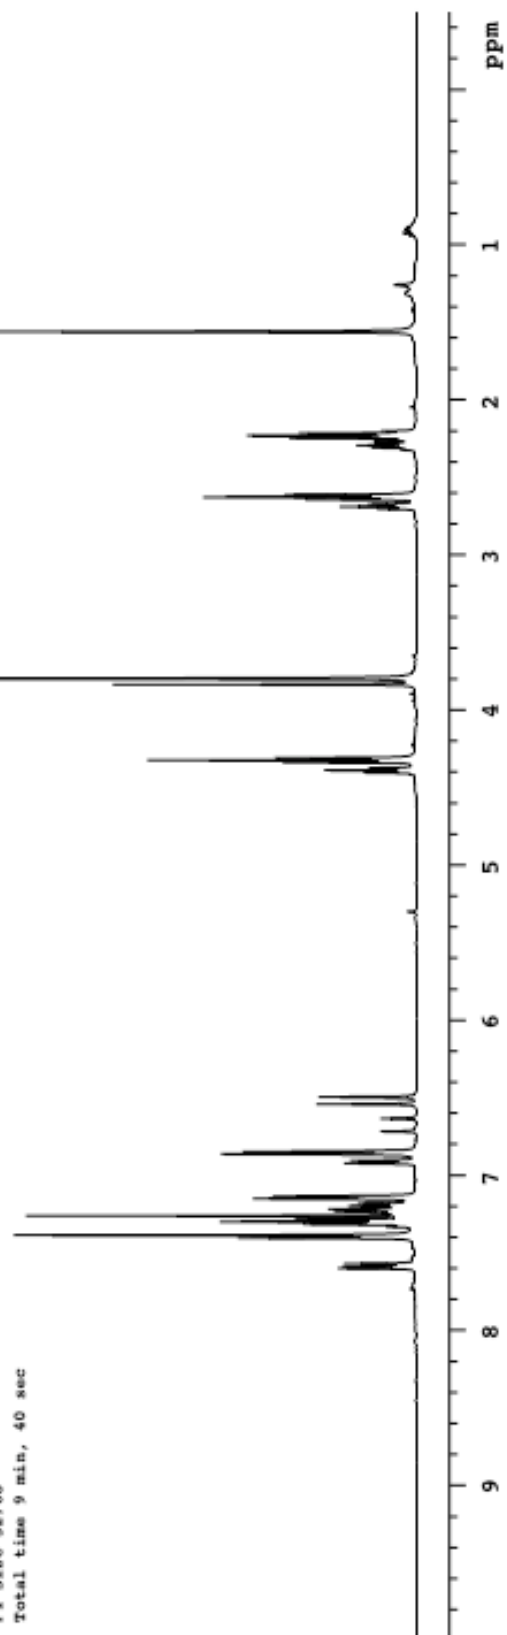

1222-RK-04-314-pure

Archive directory: /export/home/barbara/vmarsys/data  
Sample directory:

Pulse Sequence: s2pul

Solvent: cdcl3

Temp. 25.0 C / 298.1 K

Operator: barbara

File: 1222-RK-04-314-pure

INOVA-500 "ziga"

Relax. delay 1.000 sec

Pulse 45.0 degrees

Acq. time 1.892 sec

Width 7544.3 Hz

64 repetitions

OBSERVE H1, 499.7707189 MHz

DATA PROCESSING

Line broadening 0.1 Hz

FT size 32768

Total time 9 min, 40 sec

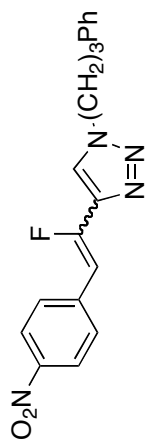

(E/Z)-21

500 MHz, CDCl<sub>3</sub>

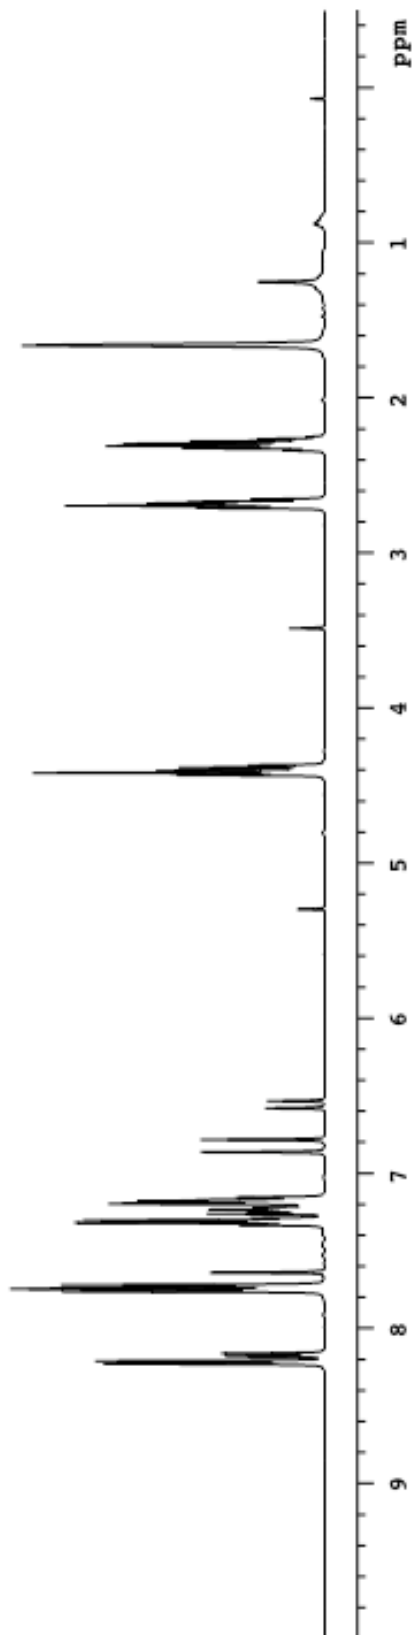

1222-RK-05-352

Archive directory: /export/home/mkl/vmrssys/data  
Sample directory: auto\_13Dec2004

Pulse Sequence: s2pul

Solvent: cdcl3

Temp. 25.0 C / 298.1 K

Operator: barbara

File: 1222-RK-05-352

INOVA-500 "ziga"

Relax. delay 1.000 sec

Pulse 45.0 degrees

Acq. time 1.892 sec

Width 7544.3 Hz

20 repetitions

OBSERVE H1, 499.7707198 MHz

DATA PROCESSING

FT size 32768

Total time 1 min, 32 sec

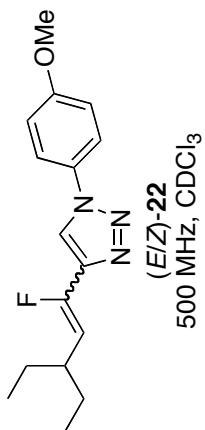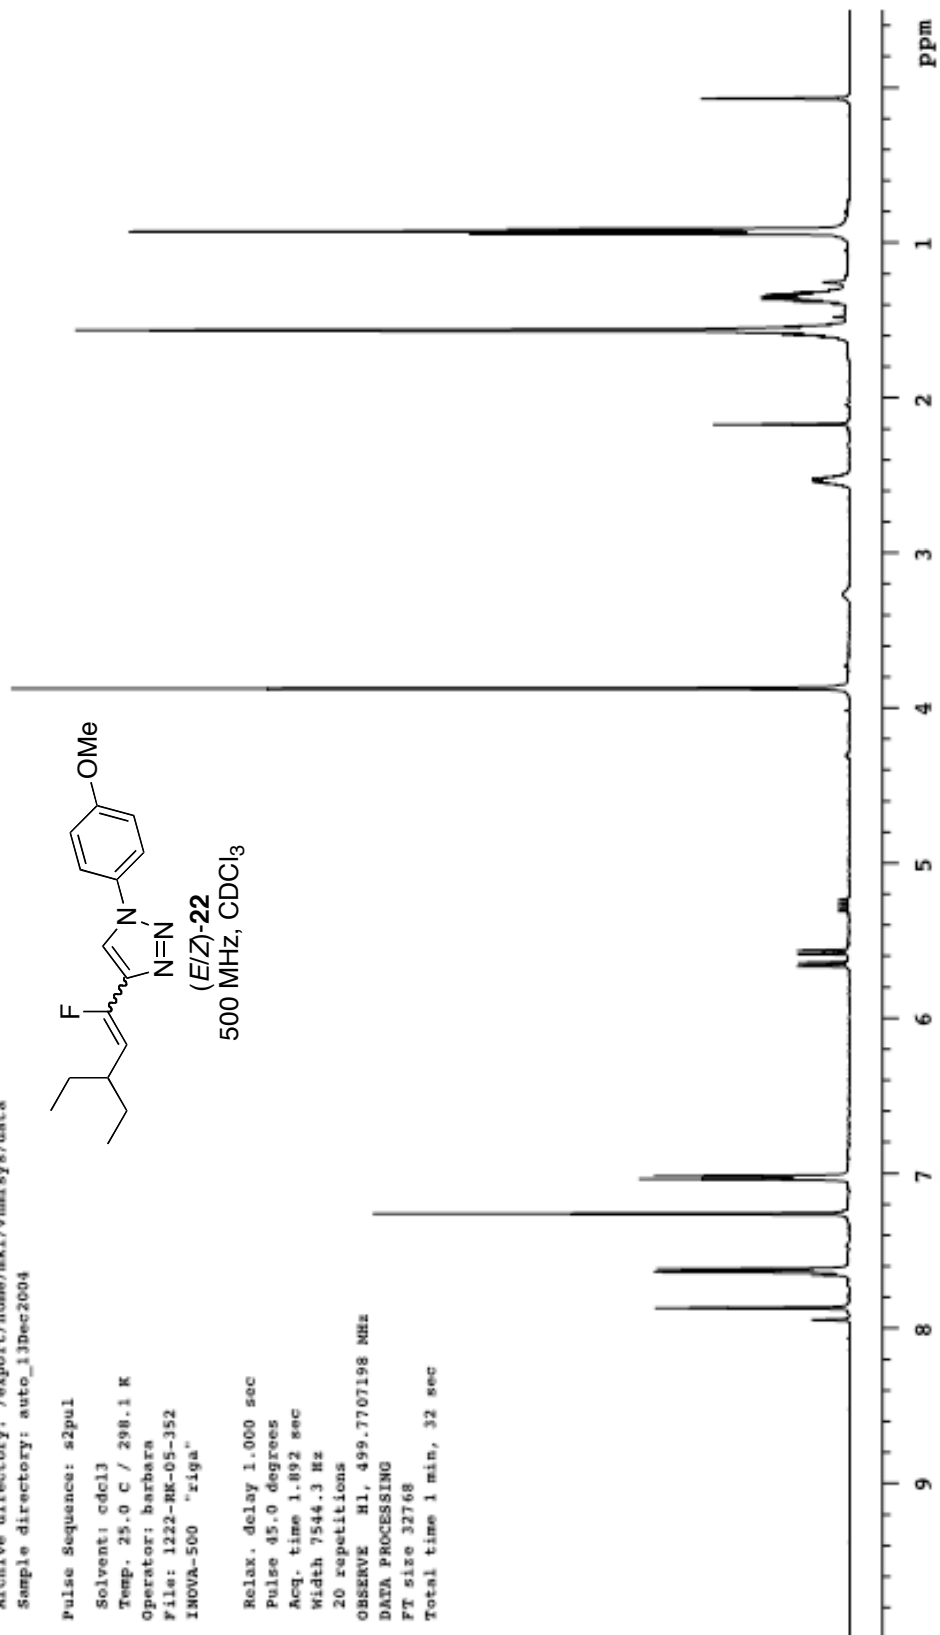

1222-MK-05-336

Archive directory: /export/home/mkl/vnmrsys/data  
Sample directory: auto\_13Dec2004  
File: 1222-MK-05-336

Pulse Sequence: s2pul  
Solvent: cdcl3  
Temp. 25.0 C / 298.1 K  
Operator: Barbara  
File: 1222-MK-05-336  
INOVA-500 "capella500"

Relax. delay 1.000 sec  
Pulse 45.0 degrees  
Acq. time 1.892 sec  
Width 7544.3 Hz  
16 repetitions  
OBSERVE H1, 499.7707226 MHz  
DATA PROCESSING  
Line broadening 0.1 Hz  
FT size 32768  
Total time 9 min, 40 sec

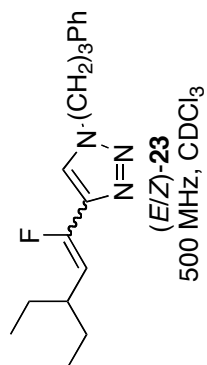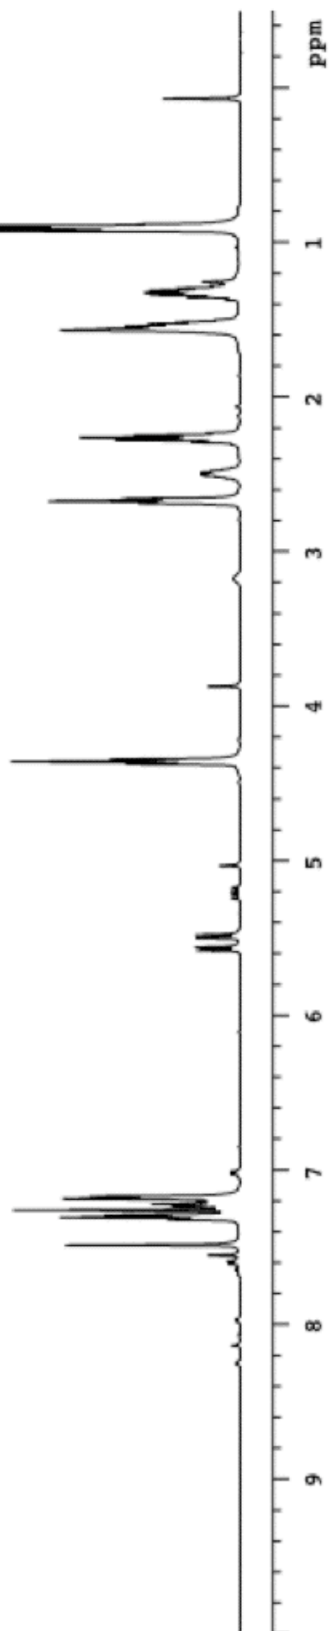

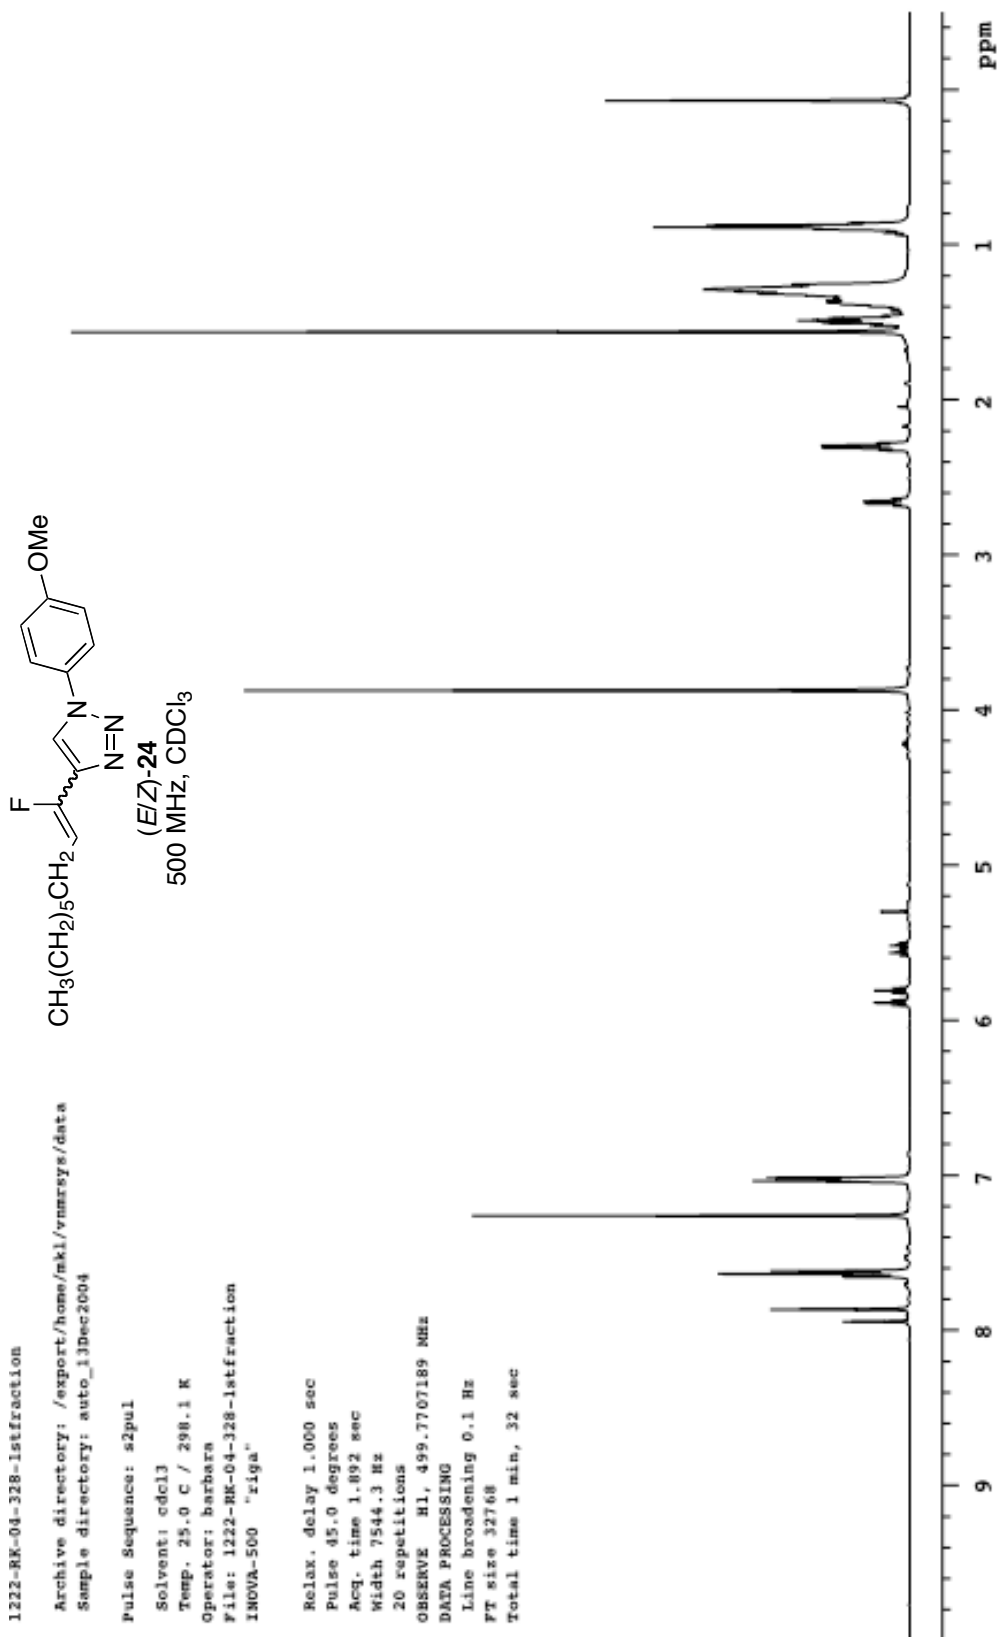

1222-MK-04-312-pure-2

Archive directory: /export/home/barbara/vnarsys/data  
Sample directory:

Pulse Sequence: s2pul

Solvent: cdcl3

Temp. 25.0 C / 298.1 K

Operator: barbara

File: 1222-MK-04-312-pure-2

INOVA-500 "ziga"

Relax. delay 1.000 sec

Pulse 45.0 degrees

Acq. time 1.892 sec

Width 7544.3 Hz

36 repetitions

OBSERVE H1, 499.7707193 MHz

DATA PROCESSING

Line broadening 0.1 Hz

FT size 32768

Total time 9 min, 40 sec

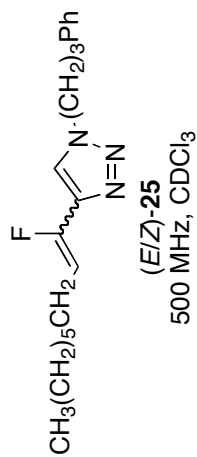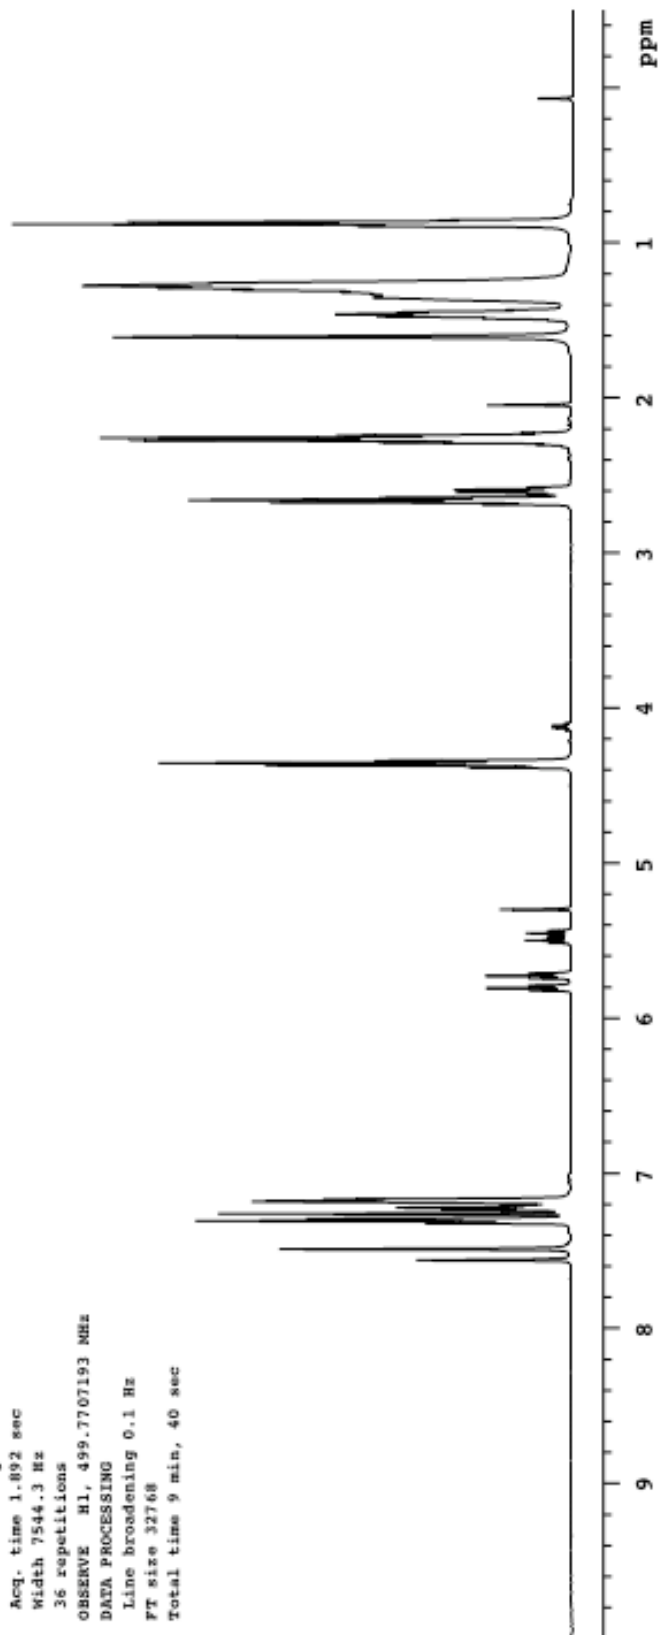



1222-RK-05-392-pure

Archive directory: /export/home/mkl/vmrssys/data  
Sample directory: auto\_13Dec2004

Pulse Sequence: s2pul

Solvent: cdcl3

Temp. 25.0 C / 298.1 K

Operator: barbara

File: 1222-RK-05-392-pure

INOVA-500 "ziga"

Relax. delay 1.000 sec

Pulse 45.0 degrees

Acq. time 1.892 sec

Width 10000.0 Hz

16 repetitions

OBSERVE H1, 499.7707212 MHz

DATA PROCESSING

Line broadening 0.1 Hz

FT size 65536

Total time 1 min, 32 sec

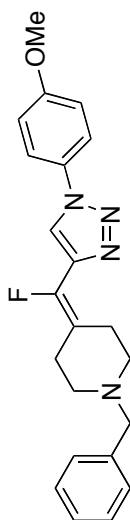

**26**

500 MHz, CDCl<sub>3</sub>

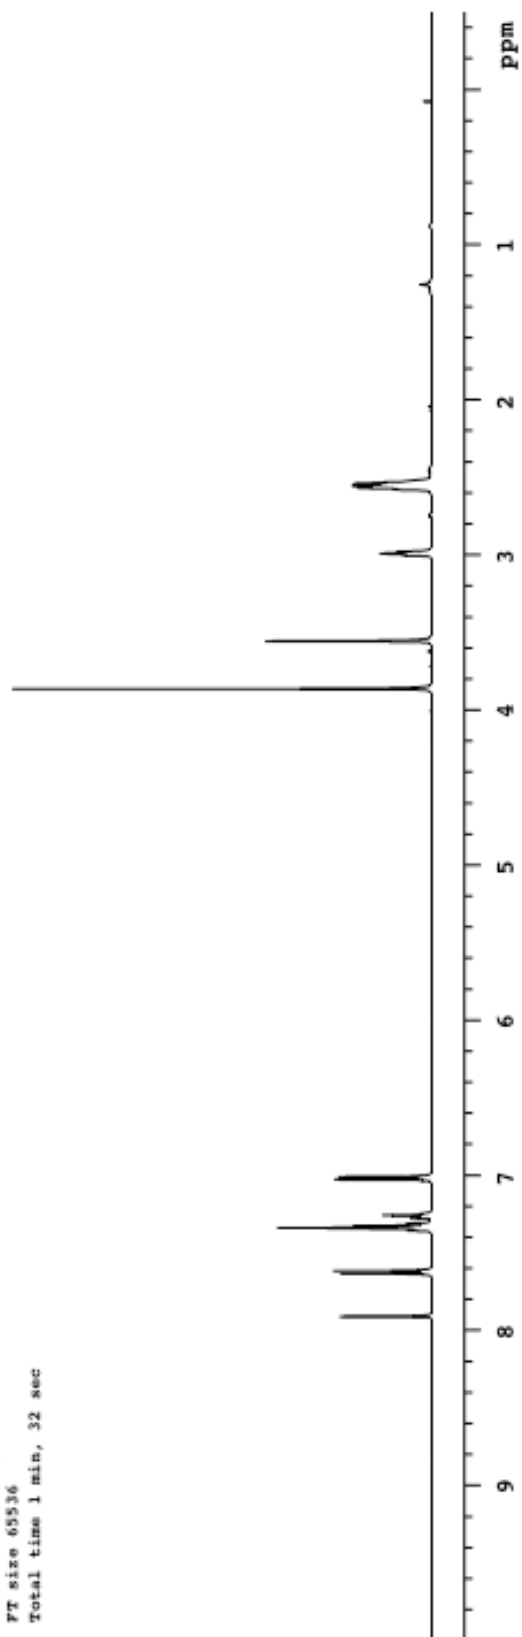

Supplement: c0cc05083k.pdf [file c0cc05083k.pdf]
